# Supplementary material
Source: PubMed Central journal article supplement (PMC6990744)
Supplement: jamapsychiatry-77-274-s001.pdf [file jamapsychiatry-77-274-s001.pdf]

## Supplementary Online Content

Suokas K, Koivisto A-M, Hakulinen C, et al. Association of income with the incidence rates of first psychiatric hospital admissions in Finland, 1996-2014. *JAMA Psychiatry*. Published online December 18, 2019. doi:10.1001/jamapsychiatry.2019.3647

**eMethods.** Main *ICD-10* Categories of Psychiatric Diagnoses

**eTable 1.** Recorded Main *ICD-10* Categories of Psychiatric Discharge Diagnoses of First Psychiatric Hospital Treatments in Finland 1996-2014

**eTable 2.** Annual Age-Standardized Incidence Rates (IRs) of First Psychiatric Hospital Admissions

**eTable 3.** Joinpoint Analysis of Sex- and Income-Specific Age-Standardized Incidence Rates of First Psychiatric Hospital Admissions With Diagnosis of Mental and Behavioural Disorders Due to Psychoactive Substance Use

**eTable 4.** Joinpoint Analysis of Sex- and Income-Specific Age-Standardized Incidence Rates of First Psychiatric Hospital Admissions With Diagnosis of Schizophrenia, Schizotypal and Delusional Disorders

**eTable 5.** Joinpoint Analysis of Sex- and Income-Specific Age-Standardized Incidence Rates of First Psychiatric Hospital Admissions With Diagnosis of Mood Disorders

**eTable 6.** Joinpoint Analysis of Sex- and Income-Specific Age-Standardized Incidence Rates of First Psychiatric Hospital Admissions With Diagnosis of Neurotic, Stress-Related and Somatoform Disorders

**eTable 7.** Contrasts of the Predicted Incidence Rate Ratios Between *ICD-10* Diagnostic Main Groups in Different Income Deciles

**eFigure 1.** Trends in Age-Standardized Incidence Rates of First Psychiatric Hospital Admissions With Organic Mental Disorders, Behavioral Syndromes Associated With Physiological Disturbances, and Personality Disorders

**eFigure 2.** Trends in Age-Standardized Incidence Rates of First Psychiatric Hospital Admissions With Disorders With Onset Usually Occurring in Childhood and Adolescence

**eFigure 3.** Trends in Age-Standardized Incidence Rates of First Psychiatric Hospital Admissions With Disorders With Major Psychotic Features

**eFigure 4.** Trends in Age-Standardized Annual Incidence Rates of First Psychiatric Hospital Admissions in the Nondwelling Finnish Population

**eFigure 5.** Trends in Income Decile- and Sex-Specific, Age-Standardized Incidence Rates of First Psychiatric Hospital Admissions With Substance Use Disorders (*ICD-10* Codes F10-F19)

**eFigure 6.** Trends in Income Decile- and Sex-Specific, Age-Standardized Incidence Rates of First Psychiatric Hospital Admissions With Schizophrenia, Schizotypal and Delusional Disorders (*ICD-10* Codes F20-F29)

**eFigure 7.** Trends in Income Decile- and Sex-Specific, Age-Standardized Incidence Rates of First Psychiatric Hospital Admissions With Mood Disorders (*ICD-10* Codes F30-F39)

**eFigure 8.** Trends in Income Decile- And Sex-Specific, Age-Standardized Incidence Rates of First Psychiatric Hospital Admissions With Neurotic, Stress-Related and Somatoform Disorders (*ICD-10* Codes F40-F48)

**eFigure 9.** Annual Sex- and Age Group–Specific Incidence Rates of First Psychiatric Hospital Admissions in the Lowest and Highest Income Deciles

**eFigure 10.** Annual Numbers of Person-Years at Risk of First Psychiatric Inpatient Treatments in the Lowest and Highest Income Deciles

**eFigure 11.** Incidence Rate Ratios for the First Psychiatric Hospital Admissions by Income With Different Diagnoses in Persons Aged 20-64 Years

**eFigure 12.** Predicted Incidence Rate Ratios for the First Psychiatric Hospital Admissions in Different *ICD-10* Diagnostic Groups in Persons Aged 20-64 Years

**eFigure 13.** Incidence Rate Ratios for First Psychiatric Hospital Admissions in the Nondwelling Population

**eFigure 14.** Incidence Rate Ratios for the First Psychiatric Hospital Admissions by Income 1 Year Before First Admission

**eFigure 15.** Incidence Rate Ratios for the First Psychiatric Hospital Admissions by Income 3 Years Before First Admission

**eFigure 16.** Incidence Rate Ratios for the First Psychiatric Hospital Admissions by Income 5 Years Before First Admission

This supplementary material has been provided by the authors to give readers additional information about their work.

## **eMethods. Main *ICD-10* Categories of Psychiatric Diagnoses**

International Statistical Classification of Diseases and Related Health Problems, Tenth Revision (ICD-10) has been used in Finland since 1996. The main ICD-10 categories of psychiatric diagnoses include:

F00-F09: Organic, including symptomatic, mental disorders

F10-F19 Mental and behavioural disorders due to psychoactive substance use

F20-F29 Schizophrenia, schizotypal and delusional disorders

F30-F39 Mood [affective] disorders; neurotic

F40-F48 Stress-related and somatoform disorders;

F50-F59 Behavioural syndromes associated with physiological disturbances and physical factors;

F60-F69 Disorders of adult personality and behavior;

F70-F79 Mental retardation;

F80-F89 Disorders of psychological development;

F90-F98 Behavioural and emotional disorders with onset usually occurring in childhood and adolescence

F99 Unspecified mental disorder

**eTable 1. Recorded Main ICD-10 Categories of Psychiatric Discharge Diagnoses of First Psychiatric Hospital Treatments in Finland 1996-2014**

| Variable                                                                                                                           | No. of First Hospital treatments (%) |
|------------------------------------------------------------------------------------------------------------------------------------|--------------------------------------|
| ICD-10 Mental and Behavioural Disorders Main groups                                                                                |                                      |
| F30-39 Mood disorders                                                                                                              | 80548 (43.3)                         |
| F10-19 Mental and behavioural disorders due to psychoactive substance use                                                          | 42233 (22.7)                         |
| F20-29 Schizophrenia, schizotypal and delusional disorders                                                                         | 35675 (19.2)                         |
| F40-48 Neurotic, stress-related and somatoform disorders                                                                           | 33078 (17.8)                         |
| F60-69 Disorders of adult personality and behaviour                                                                                | 12387 (6.7)                          |
| F90-98 Behavioural and emotional disorders with onset usually occurring in childhood and adolescence                               | 10204 (5.5)                          |
| F00-09 Organic, including symptomatic, mental disorders                                                                            | 8371 (4.5)                           |
| F50-59 Behavioural syndromes associated with physiological disturbances and physical factors                                       | 5021 (2.7)                           |
| F80-89 Disorders of psychological development                                                                                      | 2302 (1.2)                           |
| F70-79 Mental retardation                                                                                                          | 1395 (0.7)                           |
| F99 Unspecified mental disorder                                                                                                    | 176 (0.09)                           |
| Any disorder with major psychotic features <sup>a</sup>                                                                            | 53744 (28.9)                         |
| Diagnoses from two or more diagnostic main groups recorded                                                                         | 43439 (23.3)                         |
| Total number of first hospital treatments                                                                                          | 186082 (100.0)                       |
| <sup>a</sup> ICD-10 diagnoses: F20, F22-F29, F30.1, F30.2, F30.8, F30.9, F31.1, F31.2, F31.5, F31.6, F32.3, F33.3, F1x.5 and F1x.7 |                                      |

**eTable 2. Annual Age-Standardized Incidence Rates (IRs) of First Psychiatric Hospital Admissions<sup>a</sup>**

| Variable                                         | 1996                  |                                    |                                   | 1997                  |                                    |                                   |
|--------------------------------------------------|-----------------------|------------------------------------|-----------------------------------|-----------------------|------------------------------------|-----------------------------------|
|                                                  | No. of Admissions (%) | Person-years at risk, millions (%) | IR (95% CI) per 1000 Person-years | No. of Admissions (%) | Person-years at risk, millions (%) | IR (95% CI) per 1000 Person-years |
| Total <sup>b</sup>                               | 9713                  | 5.11                               | 1.90 (1.86, 1.94)                 | 9658                  | 5.12                               | 1.88 (1.84, 1.91)                 |
| Finnish citizens                                 | 9547                  | 5.04                               | 1.89 (1.86, 1.93)                 | 9455                  | 5.05                               | 1.86 (1.83, 1.90)                 |
| <b>Gender</b>                                    |                       |                                    |                                   |                       |                                    |                                   |
| Men                                              | 5423 (56.8)           | 2.45 (48.7)                        | 2.15 (2.1, 2.22)                  | 5164 (54.6)           | 2.46 (48.7)                        | 2.05 (1.99, 2.12)                 |
| Women                                            | 4124 (43.2)           | 2.59 (51.3)                        | 1.61 (1.56, 1.66)                 | 4291 (45.4)           | 2.59 (51.3)                        | 1.66 (1.61, 1.71)                 |
| <b>Income decile and non-dwelling population</b> |                       |                                    |                                   |                       |                                    |                                   |
| 1 Lowest                                         | 1870 (19.6)           | 0.47 (9.3)                         | 3.94 (3.73, 4.16)                 | 1890 (20.0)           | 0.47 (9.2)                         | 4.15 (3.93, 4.38)                 |
| 2                                                | 1206 (12.6)           | 0.49 (9.7)                         | 2.72 (2.56, 2.89)                 | 1244 (13.2)           | 0.49 (9.7)                         | 2.80 (2.64, 2.98)                 |
| 3                                                | 1047 (11.0)           | 0.49 (9.8)                         | 2.31 (2.16, 2.47)                 | 1012 (10.7)           | 0.49 (9.7)                         | 2.23 (2.09, 2.39)                 |
| 4                                                | 933 (9.8)             | 0.49 (9.8)                         | 2.06 (1.92, 2.22)                 | 841 (8.9)             | 0.49 (9.8)                         | 1.81 (1.68, 1.95)                 |
| 5                                                | 816 (8.5)             | 0.50 (9.8)                         | 1.75 (1.62, 1.91)                 | 786 (8.3)             | 0.50 (9.8)                         | 1.67 (1.55, 1.83)                 |
| 6                                                | 747 (7.8)             | 0.50 (9.8)                         | 1.63 (1.49, 1.81)                 | 728 (7.7)             | 0.50 (9.8)                         | 1.49 (1.37, 1.64)                 |
| 7                                                | 674 (7.1)             | 0.50 (9.9)                         | 1.38 (1.25, 1.57)                 | 678 (7.2)             | 0.50 (9.8)                         | 1.37 (1.25, 1.54)                 |
| 8                                                | 668 (7.0)             | 0.50 (9.9)                         | 1.36 (1.21, 1.58)                 | 636 (6.7)             | 0.50 (9.9)                         | 1.24 (1.11, 1.44)                 |
| 9                                                | 639 (6.7)             | 0.50 (9.9)                         | 1.32 (1.18, 1.53)                 | 645 (6.8)             | 0.50 (9.9)                         | 1.33 (1.16, 1.58)                 |
| 10 Highest                                       | 597 (6.3)             | 0.50 (9.9)                         | 1.22 (1.09, 1.41)                 | 576 (6.1)             | 0.50 (9.9)                         | 1.07 (0.96, 1.24)                 |
| Non-dwelling                                     | 256 (2.7)             | 0.07 (1.3)                         | 4.40 (3.83, 5.05)                 | 331 (3.5)             | 0.08 (1.6)                         | 4.53 (4.01, 5.12)                 |
| Data missing                                     | 94 (1.0)              | 0.05 (1.0)                         | 5.27 (4.05, 7.36)                 | 88 (0.9)              | 0.05 (0.9)                         | 5.15 (3.64, 13.37)                |
| <b>Income decreased in previous three years</b>  |                       |                                    |                                   |                       |                                    |                                   |
| No                                               | 6034 (63.2)           | 3.25 (64.5)                        | 1.78 (1.74, 1.83)                 | 6170 (65.3)           | 3.30 (65.3)                        | 1.79 (1.74, 1.83)                 |
| yes                                              | 3309 (34.7)           | 1.53 (30.4)                        | 2.08 (2.0, 2.16)                  | 3096 (32.7)           | 1.50 (29.7)                        | 1.98 (1.91, 2.07)                 |
| Data missing                                     | 204 (2.1)             | 0.26 (5.1)                         | 5.22 (4.37, 6.66)                 | 189 (2.0)             | 0.25 (5.0)                         | 4.84 (3.99, 6.36)                 |
| <b>Urbanicity of living municipality</b>         |                       |                                    |                                   |                       |                                    |                                   |
| Urban                                            | 6687 (70.0)           | 3.26 (64.6)                        | 2.05 (2.0, 2.1)                   | 6535 (69.1)           | 3.27 (64.9)                        | 1.98 (1.93, 2.03)                 |
| Semi Urban                                       | 1460 (15.3)           | 0.87 (17.3)                        | 1.70 (1.61, 1.79)                 | 1477 (15.6)           | 0.87 (17.2)                        | 1.72 (1.63, 1.81)                 |
| Rural                                            | 1400 (14.7)           | 0.91 (18.1)                        | 1.56 (1.48, 1.64)                 | 1443 (15.3)           | 0.90 (17.9)                        | 1.63 (1.55, 1.72)                 |
| <b>Education</b>                                 |                       |                                    |                                   |                       |                                    |                                   |
| Lower                                            | 3795 (46.5)           | 1.54 (40.8)                        | 3.07 (2.96, 3.18)                 | 3507 (43.9)           | 1.50 (39.7)                        | 2.90 (2.80, 3.01)                 |
| Secondary                                        | 3048 (37.4)           | 1.35 (35.8)                        | 2.10 (2.01, 2.22)                 | 3173 (39.7)           | 1.37 (36.2)                        | 2.13 (2.03, 2.23)                 |
| Tertiary                                         | 1316 (16.1)           | 0.88 (23.4)                        | 1.53 (1.42, 1.65)                 | 1313 (16.4)           | 0.91 (24.1)                        | 1.46 (1.36, 1.57)                 |
| <b>Living alone</b>                              |                       |                                    |                                   |                       |                                    |                                   |
| No                                               | 5105 (62.6)           | 2.88 (76.2)                        | 1.73 (1.68, 1.78)                 | 4916 (61.5)           | 2.88 (76.0)                        | 1.64 (1.59, 1.69)                 |
| Yes                                              | 3054 (37.4)           | 0.90 (23.8)                        | 3.60 (3.47, 3.74)                 | 3077 (38.5)           | 0.91 (24.0)                        | 3.64 (3.51, 3.78)                 |

<sup>a</sup>Standardized to the 2013 European Standard Population by 5-year age groups.

<sup>b</sup>Total row contains the whole data; all other rows contain Finnish citizens only.

**eTable 2. Annual Age-standardized Incidence Rates (IRs) of First Psychiatric Hospital Admissions<sup>a</sup> (continued)**

| Variable                                  | 1998                  |                                    |                                   | 1999                  |                                    |                                   |
|-------------------------------------------|-----------------------|------------------------------------|-----------------------------------|-----------------------|------------------------------------|-----------------------------------|
|                                           | No. of Admissions (%) | Person-years at risk, millions (%) | IR (95% CI) per 1000 Person-years | No. of Admissions (%) | Person-years at risk, millions (%) | IR (95% CI) per 1000 Person-years |
| Total <sup>b</sup>                        | 9907                  | 5.13                               | 1.92 (1.89, 1.96)                 | 10396                 | 5.13                               | 2.01 (1.97, 2.05)                 |
| Finnish citizens                          | 9732                  | 5.05                               | 1.92 (1.88, 1.96)                 | 10213                 | 5.05                               | 2.01 (1.97, 2.05)                 |
| Gender                                    |                       |                                    |                                   |                       |                                    |                                   |
| Men                                       | 5296 (54.4)           | 2.46 (48.7)                        | 2.10 (2.04, 2.16)                 | 5443 (53.3)           | 2.46 (48.7)                        | 2.16 (2.10, 2.22)                 |
| Women                                     | 4436 (45.6)           | 2.59 (51.3)                        | 1.72 (1.67, 1.77)                 | 4770 (46.7)           | 2.59 (51.3)                        | 1.84 (1.79, 1.90)                 |
| Income decile and non-dwelling population |                       |                                    |                                   |                       |                                    |                                   |
| 1 Lowest                                  | 2001 (20.6)           | 0.46 (9.2)                         | 4.25 (4.03, 4.48)                 | 2112 (20.7)           | 0.46 (9.1)                         | 4.39 (4.17, 4.63)                 |
| 2                                         | 1245 (12.8)           | 0.49 (9.6)                         | 2.80 (2.63, 2.97)                 | 1259 (12.3)           | 0.49 (9.6)                         | 2.82 (2.65, 2.99)                 |
| 3                                         | 1040 (10.7)           | 0.49 (9.7)                         | 2.27 (2.13, 2.43)                 | 1122 (11.0)           | 0.49 (9.7)                         | 2.48 (2.33, 2.64)                 |
| 4                                         | 929 (9.5)             | 0.49 (9.8)                         | 2.02 (1.89, 2.17)                 | 962 (9.4)             | 0.49 (9.8)                         | 2.05 (1.92, 2.20)                 |
| 5                                         | 796 (8.2)             | 0.50 (9.8)                         | 1.70 (1.58, 1.85)                 | 855 (8.4)             | 0.50 (9.8)                         | 1.79 (1.67, 1.94)                 |
| 6                                         | 750 (7.7)             | 0.50 (9.8)                         | 1.52 (1.40, 1.67)                 | 752 (7.4)             | 0.50 (9.8)                         | 1.55 (1.43, 1.71)                 |
| 7                                         | 673 (6.9)             | 0.50 (9.9)                         | 1.35 (1.22, 1.52)                 | 688 (6.7)             | 0.50 (9.9)                         | 1.39 (1.27, 1.55)                 |
| 8                                         | 631 (6.5)             | 0.50 (9.9)                         | 1.26 (1.13, 1.46)                 | 699 (6.8)             | 0.50 (9.9)                         | 1.35 (1.23, 1.52)                 |
| 9                                         | 658 (6.8)             | 0.50 (9.9)                         | 1.35 (1.21, 1.56)                 | 645 (6.3)             | 0.50 (9.9)                         | 1.33 (1.18, 1.54)                 |
| 10 Highest                                | 579 (5.9)             | 0.50 (9.9)                         | 1.24 (1.10, 1.42)                 | 610 (6.0)             | 0.50 (9.9)                         | 1.24 (1.11, 1.41)                 |
| Non-dwelling                              | 324 (3.3)             | 0.08 (1.6)                         | 4.70 (4.15, 5.31)                 | 373 (3.7)             | 0.08 (1.6)                         | 5.14 (4.59, 5.76)                 |
| Data missing                              | 106 (1.1)             | 0.04 (0.9)                         | 7.21 (5.01, 11.96)                | 136 (1.3)             | 0.05 (0.9)                         | 6.44 (5.07, 9.65)                 |
| Income decreased in previous three years  |                       |                                    |                                   |                       |                                    |                                   |
| No                                        | 6291 (64.6)           | 3.25 (64.5)                        | 1.86 (1.81, 1.90)                 | 6407 (62.7)           | 3.24 (64.2)                        | 1.90 (1.85, 1.95)                 |
| yes                                       | 3253 (33.4)           | 1.55 (30.7)                        | 2.03 (1.95, 2.10)                 | 3588 (35.1)           | 1.57 (31.0)                        | 2.20 (2.13, 2.28)                 |
| Data missing                              | 188 (1.9)             | 0.24 (4.8)                         | 5.25 (4.30, 6.70)                 | 218 (2.1)             | 0.24 (4.7)                         | 4.85 (4.16, 5.87)                 |
| Urbanicity of living municipality         |                       |                                    |                                   |                       |                                    |                                   |
| Urban                                     | 6817 (70.0)           | 3.29 (65.1)                        | 2.06 (2.01, 2.11)                 | 7155 (70.1)           | 3.30 (65.4)                        | 2.14 (2.09, 2.19)                 |
| Semi Urban                                | 1470 (15.1)           | 0.87 (17.2)                        | 1.72 (1.63, 1.81)                 | 1614 (15.8)           | 0.86 (17.1)                        | 1.89 (1.79, 1.98)                 |
| Rural                                     | 1445 (14.8)           | 0.89 (17.7)                        | 1.64 (1.56, 1.73)                 | 1444 (14.1)           | 0.88 (17.5)                        | 1.65 (1.57, 1.74)                 |
| Education                                 |                       |                                    |                                   |                       |                                    |                                   |
| Lower                                     | 3766 (46.2)           | 1.47 (38.7)                        | 3.32 (3.20, 3.45)                 | 3676 (43.7)           | 1.43 (37.7)                        | 3.36 (3.24, 3.49)                 |
| Secondary                                 | 3057 (37.5)           | 1.39 (36.6)                        | 2.02 (1.93, 2.12)                 | 3323 (39.5)           | 1.41 (37.1)                        | 2.14 (2.05, 2.24)                 |
| Tertiary                                  | 1326 (16.3)           | 0.93 (24.7)                        | 1.50 (1.40, 1.61)                 | 1406 (16.7)           | 0.96 (25.2)                        | 1.44 (1.35, 1.54)                 |
| Living alone                              |                       |                                    |                                   |                       |                                    |                                   |
| No                                        | 5033 (61.8)           | 2.87 (75.7)                        | 1.69 (1.64, 1.74)                 | 5133 (61.1)           | 2.86 (75.4)                        | 1.74 (1.69, 1.79)                 |
| Yes                                       | 3116 (38.2)           | 0.92 (24.3)                        | 3.53 (3.41, 3.66)                 | 3272 (38.9)           | 0.93 (24.6)                        | 3.66 (3.53, 3.79)                 |

<sup>a</sup>Standardized to the 2013 European Standard Population by 5-year age groups.

<sup>b</sup>Total row contains the whole data; all other rows contain Finnish citizens only

**eTable 2. Annual Age-standardized Incidence Rates (IRs) of First Psychiatric Hospital Admissions<sup>a</sup> (continued)**

| Variable                                  | 2000                  |                                    |                                   | 2001                  |                                    |                                   |
|-------------------------------------------|-----------------------|------------------------------------|-----------------------------------|-----------------------|------------------------------------|-----------------------------------|
|                                           | No. of Admissions (%) | Person-years at risk, millions (%) | IR (95% CI) per 1000 Person-years | No. of Admissions (%) | Person-years at risk, millions (%) | IR (95% CI) per 1000 Person-years |
| Total <sup>b</sup>                        | 10724                 | 5.13                               | 2.06 (2.02, 2.10)                 | 10607                 | 5.13                               | 2.05 (2.01, 2.09)                 |
| Finnish citizens                          | 10527                 | 5.04                               | 2.06 (2.02, 2.10)                 | 10406                 | 5.04                               | 2.05 (2.01, 2.09)                 |
| Gender                                    |                       |                                    |                                   |                       |                                    |                                   |
| Men                                       | 5537 (52.6)           | 2.46 (48.7)                        | 2.18 (2.12, 2.24)                 | 5330 (51.2)           | 2.46 (48.8)                        | 2.13 (2.07, 2.19)                 |
| Women                                     | 4990 (47.4)           | 2.59 (51.3)                        | 1.92 (1.86, 1.97)                 | 5076 (48.8)           | 2.58 (51.2)                        | 1.95 (1.90, 2.01)                 |
| Income decile and non-dwelling population |                       |                                    |                                   |                       |                                    |                                   |
| 1 Lowest                                  | 2259 (21.5)           | 0.46 (9.1)                         | 4.77 (4.54, 5.01)                 | 2138 (20.5)           | 0.46 (9.1)                         | 4.57 (4.35, 4.81)                 |
| 2                                         | 1320 (12.5)           | 0.49 (9.6)                         | 3.01 (2.84, 3.19)                 | 1354 (13.0)           | 0.48 (9.6)                         | 3.08 (2.91, 3.27)                 |
| 3                                         | 1136 (10.8)           | 0.49 (9.7)                         | 2.49 (2.34, 2.65)                 | 1152 (11.1)           | 0.49 (9.7)                         | 2.50 (2.35, 2.66)                 |
| 4                                         | 972 (9.2)             | 0.49 (9.8)                         | 2.08 (1.95, 2.23)                 | 976 (9.4)             | 0.49 (9.8)                         | 2.09 (1.95, 2.24)                 |
| 5                                         | 865 (8.2)             | 0.50 (9.8)                         | 1.78 (1.66, 1.92)                 | 900 (8.6)             | 0.50 (9.8)                         | 1.86 (1.73, 2.00)                 |
| 6                                         | 818 (7.8)             | 0.50 (9.8)                         | 1.62 (1.51, 1.77)                 | 799 (7.7)             | 0.50 (9.9)                         | 1.62 (1.50, 1.78)                 |
| 7                                         | 728 (6.9)             | 0.50 (9.9)                         | 1.45 (1.33, 1.61)                 | 726 (7.0)             | 0.50 (9.9)                         | 1.46 (1.34, 1.61)                 |
| 8                                         | 702 (6.7)             | 0.50 (9.9)                         | 1.42 (1.29, 1.61)                 | 673 (6.5)             | 0.50 (9.9)                         | 1.37 (1.24, 1.54)                 |
| 9                                         | 640 (6.1)             | 0.50 (9.9)                         | 1.24 (1.11, 1.42)                 | 650 (6.2)             | 0.50 (9.9)                         | 1.31 (1.16, 1.51)                 |
| 10 Highest                                | 583 (5.5)             | 0.50 (9.9)                         | 1.22 (1.10, 1.38)                 | 558 (5.4)             | 0.50 (9.9)                         | 1.22 (1.08, 1.39)                 |
| Non-dwelling                              | 354 (3.4)             | 0.08 (1.7)                         | 4.96 (4.42, 5.57)                 | 341 (3.3)             | 0.09 (1.7)                         | 4.52 (4.01, 5.09)                 |
| Data missing                              | 150 (1.4)             | 0.05 (0.9)                         | 7.38 (5.63, 10.81)                | 139 (1.3)             | 0.05 (0.9)                         | 8.27 (6.2, 12.59)                 |
| Income decreased in previous three years  |                       |                                    |                                   |                       |                                    |                                   |
| No                                        | 6600 (62.7)           | 3.19 (63.2)                        | 1.98 (1.93, 2.03)                 | 6579 (63.2)           | 3.22 (63.8)                        | 1.97 (1.92, 2.02)                 |
| yes                                       | 3701 (35.2)           | 1.62 (32.1)                        | 2.19 (2.12, 2.26)                 | 3602 (34.6)           | 1.59 (31.6)                        | 2.17 (2.10, 2.25)                 |
| Data missing                              | 226 (2.1)             | 0.23 (4.7)                         | 5.31 (4.51, 6.85)                 | 225 (2.2)             | 0.23 (4.6)                         | 6.25 (5.13, 8.13)                 |
| Urbanicity of living municipality         |                       |                                    |                                   |                       |                                    |                                   |
| Urban                                     | 7504 (71.3)           | 3.31 (65.7)                        | 2.23 (2.17, 2.28)                 | 7318 (70.3)           | 3.32 (65.9)                        | 2.17 (2.12, 2.23)                 |
| Semi Urban                                | 1533 (14.6)           | 0.86 (17.0)                        | 1.79 (1.70, 1.88)                 | 1574 (15.1)           | 0.86 (17.0)                        | 1.87 (1.77, 1.96)                 |
| Rural                                     | 1490 (14.2)           | 0.87 (17.3)                        | 1.73 (1.64, 1.82)                 | 1514 (14.5)           | 0.86 (17.1)                        | 1.77 (1.68, 1.87)                 |
| Education                                 |                       |                                    |                                   |                       |                                    |                                   |
| Lower                                     | 3628 (42.9)           | 1.40 (36.7)                        | 3.51 (3.38, 3.64)                 | 3471 (41.4)           | 1.36 (35.8)                        | 3.38 (3.25, 3.52)                 |
| Secondary                                 | 3423 (40.5)           | 1.43 (37.7)                        | 2.20 (2.11, 2.30)                 | 3374 (40.3)           | 1.45 (38.2)                        | 2.18 (2.09, 2.28)                 |
| Tertiary                                  | 1411 (16.7)           | 0.97 (25.6)                        | 1.50 (1.41, 1.61)                 | 1530 (18.3)           | 0.99 (26.1)                        | 1.60 (1.50, 1.71)                 |
| Living alone                              |                       |                                    |                                   |                       |                                    |                                   |
| No                                        | 5207 (61.5)           | 2.86 (75.1)                        | 1.75 (1.71, 1.81)                 | 5201 (62.1)           | 2.86 (74.9)                        | 1.78 (1.73, 1.83)                 |
| Yes                                       | 3255 (38.5)           | 0.95 (24.9)                        | 3.63 (3.51, 3.76)                 | 3174 (37.9)           | 0.96 (25.1)                        | 3.45 (3.32, 3.57)                 |

<sup>a</sup>Standardized to the 2013 European Standard Population by 5-year age groups.

<sup>b</sup>Total row contains the whole data; all other rows contain Finnish citizens only

**eTable 2. Annual Age-standardized Incidence Rates (IRs) of First Psychiatric Hospital Admissions<sup>a</sup> (continued)**

| Variable                                  | 2002                  |                                    |                                   | 2003                  |                                    |                                   |
|-------------------------------------------|-----------------------|------------------------------------|-----------------------------------|-----------------------|------------------------------------|-----------------------------------|
|                                           | No. of Admissions (%) | Person-years at risk, millions (%) | IR (95% CI) per 1000 Person-years | No. of Admissions (%) | Person-years at risk, millions (%) | IR (95% CI) per 1000 Person-years |
| Total <sup>b</sup>                        | 10603                 | 5.14                               | 2.04 (2.00, 2.08)                 | 10485                 | 5.14                               | 2.02 (1.98, 2.06)                 |
| Finnish citizens                          | 10366                 | 5.04                               | 2.04 (2.00, 2.08)                 | 10275                 | 5.04                               | 2.02 (1.98, 2.06)                 |
| Gender                                    |                       |                                    |                                   |                       |                                    |                                   |
| Men                                       | 5425 (52.3)           | 2.46 (48.8)                        | 2.16 (2.10, 2.22)                 | 5117 (49.8)           | 2.46 (48.8)                        | 2.04 (1.98, 2.10)                 |
| Women                                     | 4941 (47.7)           | 2.58 (51.2)                        | 1.90 (1.85, 1.96)                 | 5158 (50.2)           | 2.58 (51.2)                        | 1.99 (1.93, 2.04)                 |
| Income decile and non-dwelling population |                       |                                    |                                   |                       |                                    |                                   |
| 1 Lowest                                  | 2249 (21.7)           | 0.45 (9.0)                         | 4.85 (4.62, 5.10)                 | 2278 (22.2)           | 0.45 (9.0)                         | 4.96 (4.72, 5.22)                 |
| 2                                         | 1364 (13.2)           | 0.48 (9.6)                         | 3.19 (3.01, 3.38)                 | 1354 (13.2)           | 0.48 (9.6)                         | 3.08 (2.91, 3.27)                 |
| 3                                         | 1181 (11.4)           | 0.49 (9.7)                         | 2.62 (2.46, 2.78)                 | 1146 (11.2)           | 0.49 (9.7)                         | 2.49 (2.34, 2.65)                 |
| 4                                         | 885 (8.5)             | 0.49 (9.8)                         | 1.89 (1.76, 2.03)                 | 952 (9.3)             | 0.49 (9.8)                         | 1.99 (1.86, 2.14)                 |
| 5                                         | 857 (8.3)             | 0.49 (9.8)                         | 1.78 (1.66, 1.93)                 | 831 (8.1)             | 0.50 (9.8)                         | 1.70 (1.58, 1.83)                 |
| 6                                         | 830 (8.0)             | 0.50 (9.9)                         | 1.70 (1.58, 1.85)                 | 775 (7.5)             | 0.50 (9.9)                         | 1.55 (1.44, 1.70)                 |
| 7                                         | 672 (6.5)             | 0.50 (9.9)                         | 1.32 (1.21, 1.47)                 | 710 (6.9)             | 0.50 (9.9)                         | 1.43 (1.31, 1.59)                 |
| 8                                         | 675 (6.5)             | 0.50 (9.9)                         | 1.36 (1.23, 1.53)                 | 634 (6.2)             | 0.50 (9.9)                         | 1.26 (1.14, 1.41)                 |
| 9                                         | 588 (5.7)             | 0.50 (9.9)                         | 1.16 (1.05, 1.34)                 | 595 (5.8)             | 0.50 (9.9)                         | 1.27 (1.13, 1.46)                 |
| 10 Highest                                | 569 (5.5)             | 0.50 (9.9)                         | 1.23 (1.10, 1.40)                 | 541 (5.3)             | 0.50 (9.9)                         | 1.16 (1.04, 1.32)                 |
| Non-dwelling                              | 350 (3.4)             | 0.08 (1.7)                         | 4.82 (4.30, 5.41)                 | 329 (3.2)             | 0.08 (1.7)                         | 4.73 (4.20, 5.33)                 |
| Data missing                              | 146 (1.4)             | 0.05 (0.9)                         | 6.96 (5.45, 11.79)                | 130 (1.3)             | 0.05 (0.9)                         | 5.82 (4.42, 9.74)                 |
| Income decreased in previous three years  |                       |                                    |                                   |                       |                                    |                                   |
| No                                        | 6601 (63.7)           | 3.26 (64.8)                        | 1.94 (1.90, 1.99)                 | 6683 (65.0)           | 3.33 (66.0)                        | 1.94 (1.89, 1.98)                 |
| yes                                       | 3527 (34.0)           | 1.54 (30.6)                        | 2.18 (2.10, 2.25)                 | 3351 (32.6)           | 1.48 (29.3)                        | 2.13 (2.06, 2.21)                 |
| Data missing                              | 238 (2.3)             | 0.23 (4.6)                         | 5.28 (4.44, 6.95)                 | 241 (2.3)             | 0.23 (4.6)                         | 5.46 (4.54, 7.12)                 |
| Urbanicity of living municipality         |                       |                                    |                                   |                       |                                    |                                   |
| Urban                                     | 7222 (69.7)           | 3.33 (66.1)                        | 2.13 (2.08, 2.18)                 | 7128 (69.4)           | 3.34 (66.3)                        | 2.10 (2.05, 2.15)                 |
| Semi Urban                                | 1595 (15.4)           | 0.85 (17.0)                        | 1.87 (1.78, 1.97)                 | 1580 (15.4)           | 0.85 (16.9)                        | 1.87 (1.77, 1.96)                 |
| Rural                                     | 1549 (14.9)           | 0.85 (16.9)                        | 1.85 (1.75, 1.94)                 | 1567 (15.3)           | 0.85 (16.8)                        | 1.86 (1.77, 1.96)                 |
| Education                                 |                       |                                    |                                   |                       |                                    |                                   |
| Lower                                     | 3450 (41.2)           | 1.33 (34.8)                        | 3.49 (3.36, 3.63)                 | 3308 (40.2)           | 1.30 (33.9)                        | 3.34 (3.21, 3.48)                 |
| Secondary                                 | 3526 (42.1)           | 1.48 (38.6)                        | 2.17 (2.09, 2.27)                 | 3491 (42.4)           | 1.50 (39.1)                        | 2.13 (2.04, 2.22)                 |
| Tertiary                                  | 1404 (16.8)           | 1.01 (26.5)                        | 1.45 (1.36, 1.55)                 | 1434 (17.4)           | 1.03 (27.0)                        | 1.41 (1.32, 1.51)                 |
| Living alone                              |                       |                                    |                                   |                       |                                    |                                   |
| No                                        | 5105 (60.9)           | 2.85 (74.6)                        | 1.74 (1.69, 1.79)                 | 4916 (59.7)           | 2.85 (74.4)                        | 1.68 (1.63, 1.73)                 |
| Yes                                       | 3275 (39.1)           | 0.97 (25.4)                        | 3.53 (3.41, 3.66)                 | 3317 (40.3)           | 0.98 (25.6)                        | 3.53 (3.40, 3.66)                 |

<sup>a</sup>Standardized to the 2013 European Standard Population by 5-year age groups.

<sup>b</sup>Total row contains the whole data; all other rows contain Finnish citizens only

**eTable 2. Annual Age-standardized Incidence Rates (IRs) of First Psychiatric Hospital Admissions<sup>a</sup> (continued)**

| Variable                                  | 2004                  |                                    |                                   | 2005                  |                                    |                                   |
|-------------------------------------------|-----------------------|------------------------------------|-----------------------------------|-----------------------|------------------------------------|-----------------------------------|
|                                           | No. of Admissions (%) | Person-years at risk, millions (%) | IR (95% CI) per 1000 Person-years | No. of Admissions (%) | Person-years at risk, millions (%) | IR (95% CI) per 1000 Person-years |
| Total <sup>b</sup>                        | 10495                 | 5.15                               | 2.02 (1.98, 2.06)                 | 10474                 | 5.16                               | 2.01 (1.98, 2.05)                 |
| Finnish citizens                          | 10266                 | 5.04                               | 2.02 (1.98, 2.06)                 | 10229                 | 5.05                               | 2.01 (1.97, 2.05)                 |
| Gender                                    |                       |                                    |                                   |                       |                                    |                                   |
| Men                                       | 5154 (50.2)           | 2.46 (48.8)                        | 2.05 (2.00, 2.11)                 | 4947 (48.4)           | 2.47 (48.8)                        | 1.99 (1.93, 2.04)                 |
| Women                                     | 5112 (49.8)           | 2.58 (51.2)                        | 1.97 (1.92, 2.02)                 | 5282 (51.6)           | 2.58 (51.2)                        | 2.03 (1.97, 2.08)                 |
| Income decile and non-dwelling population |                       |                                    |                                   |                       |                                    |                                   |
| 1 Lowest                                  | 2247 (21.9)           | 0.45 (9.0)                         | 4.94 (4.70, 5.20)                 | 2223 (21.7)           | 0.45 (8.9)                         | 5.02 (4.78, 5.29)                 |
| 2                                         | 1358 (13.2)           | 0.48 (9.6)                         | 3.20 (3.02, 3.39)                 | 1413 (13.8)           | 0.48 (9.6)                         | 3.24 (3.06, 3.43)                 |
| 3                                         | 1117 (10.9)           | 0.49 (9.7)                         | 2.50 (2.35, 2.66)                 | 1196 (11.7)           | 0.49 (9.7)                         | 2.63 (2.47, 2.79)                 |
| 4                                         | 972 (9.5)             | 0.49 (9.8)                         | 2.05 (1.92, 2.19)                 | 964 (9.4)             | 0.49 (9.8)                         | 2.03 (1.90, 2.18)                 |
| 5                                         | 875 (8.5)             | 0.50 (9.8)                         | 1.80 (1.68, 1.94)                 | 837 (8.2)             | 0.50 (9.9)                         | 1.72 (1.60, 1.86)                 |
| 6                                         | 794 (7.7)             | 0.50 (9.9)                         | 1.59 (1.47, 1.73)                 | 770 (7.5)             | 0.50 (9.9)                         | 1.54 (1.43, 1.67)                 |
| 7                                         | 698 (6.8)             | 0.50 (9.9)                         | 1.38 (1.27, 1.53)                 | 717 (7.0)             | 0.50 (9.9)                         | 1.40 (1.29, 1.54)                 |
| 8                                         | 661 (6.4)             | 0.50 (9.9)                         | 1.35 (1.22, 1.52)                 | 617 (6.0)             | 0.50 (9.9)                         | 1.24 (1.12, 1.39)                 |
| 9                                         | 570 (5.6)             | 0.50 (9.9)                         | 1.14 (1.02, 1.31)                 | 532 (5.2)             | 0.50 (10.0)                        | 1.08 (0.97, 1.25)                 |
| 10 Highest                                | 483 (4.7)             | 0.50 (9.9)                         | 1.02 (0.90, 1.17)                 | 476 (4.7)             | 0.50 (10.0)                        | 0.96 (0.85, 1.10)                 |
| Non-dwelling                              | 358 (3.5)             | 0.08 (1.7)                         | 5.11 (4.57, 5.72)                 | 379 (3.7)             | 0.08 (1.7)                         | 5.37 (4.81, 6.00)                 |
| Data missing                              | 133 (1.3)             | 0.05 (0.9)                         | 6.43 (4.88, 9.96)                 | 105 (1.0)             | 0.04 (0.8)                         | 7.01 (5.46, 9.93)                 |
| Income decreased in previous three years  |                       |                                    |                                   |                       |                                    |                                   |
| No                                        | 6722 (65.5)           | 3.39 (67.2)                        | 1.91 (1.87, 1.96)                 | 6748 (66.0)           | 3.39 (67.1)                        | 1.92 (1.87, 1.97)                 |
| yes                                       | 3312 (32.3)           | 1.42 (28.1)                        | 2.19 (2.12, 2.28)                 | 3264 (31.9)           | 1.43 (28.3)                        | 2.17 (2.09, 2.25)                 |
| Data missing                              | 232 (2.3)             | 0.23 (4.6)                         | 4.92 (4.17, 6.31)                 | 217 (2.1)             | 0.23 (4.6)                         | 4.70 (4.01, 5.98)                 |
| Urbanicity of living municipality         |                       |                                    |                                   |                       |                                    |                                   |
| Urban                                     | 7007 (68.3)           | 3.35 (66.4)                        | 2.06 (2.01, 2.11)                 | 7044 (68.9)           | 3.36 (66.5)                        | 2.07 (2.02, 2.12)                 |
| Semi Urban                                | 1682 (16.4)           | 0.85 (16.9)                        | 1.98 (1.89, 2.08)                 | 1591 (15.6)           | 0.85 (16.9)                        | 1.86 (1.77, 1.96)                 |
| Rural                                     | 1577 (15.4)           | 0.84 (16.7)                        | 1.90 (1.80, 2.00)                 | 1594 (15.6)           | 0.83 (16.5)                        | 1.91 (1.81, 2.00)                 |
| Education                                 |                       |                                    |                                   |                       |                                    |                                   |
| Lower                                     | 3344 (40.3)           | 1.27 (33.0)                        | 3.54 (3.40, 3.69)                 | 3351 (40.6)           | 1.24 (32.1)                        | 3.56 (3.42, 3.70)                 |
| Secondary                                 | 3512 (42.3)           | 1.52 (39.6)                        | 2.15 (2.07, 2.24)                 | 3472 (42.0)           | 1.54 (40.0)                        | 2.18 (2.09, 2.27)                 |
| Tertiary                                  | 1442 (17.4)           | 1.06 (27.5)                        | 1.38 (1.29, 1.47)                 | 1435 (17.4)           | 1.08 (27.9)                        | 1.34 (1.26, 1.43)                 |
| Living alone                              |                       |                                    |                                   |                       |                                    |                                   |
| No                                        | 4936 (59.5)           | 2.85 (74.2)                        | 1.69 (1.64, 1.74)                 | 4814 (58.3)           | 2.85 (73.9)                        | 1.67 (1.62, 1.72)                 |
| Yes                                       | 3362 (40.5)           | 0.99 (25.8)                        | 3.55 (3.43, 3.68)                 | 3444 (41.7)           | 1.01 (26.1)                        | 3.59 (3.47, 3.72)                 |

<sup>a</sup>Standardized to the 2013 European Standard Population by 5-year age groups.

<sup>b</sup>Total row contains the whole data; all other rows contain Finnish citizens only



**eTable 2. Annual Age-standardized Incidence Rates (IRs) of First Psychiatric Hospital Admissions<sup>a</sup> (continued)**

| Variable                                  | 2006                  |                                    |                                   | 2007                  |                                    |                                   |
|-------------------------------------------|-----------------------|------------------------------------|-----------------------------------|-----------------------|------------------------------------|-----------------------------------|
|                                           | No. of Admissions (%) | Person-years at risk, millions (%) | IR (95% CI) per 1000 Person-years | No. of Admissions (%) | Person-years at risk, millions (%) | IR (95% CI) per 1000 Person-years |
| Total <sup>b</sup>                        | 10451                 | 5.17                               | 2.01 (1.97, 2.05)                 | 10511                 | 5.18                               | 2.00 (1.97, 2.04)                 |
| Finnish citizens                          | 10252                 | 5.05                               | 2.02 (1.98, 2.06)                 | 10236                 | 5.06                               | 2.00 (1.96, 2.04)                 |
| Gender                                    |                       |                                    |                                   |                       |                                    |                                   |
| Men                                       | 4893 (47.7)           | 2.47 (48.9)                        | 1.96 (1.90, 2.02)                 | 5000 (48.8)           | 2.47 (48.9)                        | 1.99 (1.94, 2.05)                 |
| Women                                     | 5359 (52.3)           | 2.59 (51.1)                        | 2.06 (2.00, 2.12)                 | 5236 (51.2)           | 2.59 (51.1)                        | 2.01 (1.95, 2.06)                 |
| Income decile and non-dwelling population |                       |                                    |                                   |                       |                                    |                                   |
| 1 Lowest                                  | 2259 (22.0)           | 0.45 (8.9)                         | 5.30 (5.04, 5.58)                 | 2234 (21.8)           | 0.45 (8.8)                         | 4.88 (4.65, 5.13)                 |
| 2                                         | 1482 (14.5)           | 0.48 (9.6)                         | 3.41 (3.22, 3.61)                 | 1432 (14.0)           | 0.48 (9.6)                         | 3.40 (3.21, 3.60)                 |
| 3                                         | 1231 (12.0)           | 0.49 (9.7)                         | 2.68 (2.52, 2.85)                 | 1143 (11.2)           | 0.49 (9.7)                         | 2.47 (2.32, 2.63)                 |
| 4                                         | 986 (9.6)             | 0.50 (9.8)                         | 2.09 (1.95, 2.23)                 | 994 (9.7)             | 0.50 (9.8)                         | 2.07 (1.94, 2.21)                 |
| 5                                         | 844 (8.2)             | 0.50 (9.9)                         | 1.72 (1.60, 1.85)                 | 873 (8.5)             | 0.50 (9.9)                         | 1.74 (1.62, 1.87)                 |
| 6                                         | 741 (7.2)             | 0.50 (9.9)                         | 1.46 (1.36, 1.60)                 | 751 (7.3)             | 0.50 (9.9)                         | 1.47 (1.37, 1.60)                 |
| 7                                         | 665 (6.5)             | 0.50 (9.9)                         | 1.37 (1.25, 1.52)                 | 673 (6.6)             | 0.50 (9.9)                         | 1.30 (1.19, 1.43)                 |
| 8                                         | 562 (5.5)             | 0.50 (9.9)                         | 1.12 (1.01, 1.26)                 | 620 (6.1)             | 0.50 (10.0)                        | 1.27 (1.15, 1.43)                 |
| 9                                         | 532 (5.2)             | 0.50 (10.0)                        | 1.02 (0.92, 1.19)                 | 561 (5.5)             | 0.51 (10.0)                        | 1.15 (1.02, 1.33)                 |
| 10 Highest                                | 483 (4.7)             | 0.50 (10.0)                        | 0.99 (0.88, 1.13)                 | 449 (4.4)             | 0.51 (10.0)                        | 1.09 (0.96, 1.25)                 |
| Non-dwelling                              | 393 (3.8)             | 0.08 (1.6)                         | 5.58 (5.01, 6.23)                 | 408 (4.0)             | 0.08 (1.6)                         | 5.80 (5.23, 6.45)                 |
| Data missing                              | 74 (0.7)              | 0.04 (0.8)                         | 5.64 (4.17, 9.07)                 | 98 (1.0)              | 0.04 (0.8)                         | 6.61 (5.18, 9.29)                 |
| Income decreased in previous three years  |                       |                                    |                                   |                       |                                    |                                   |
| No                                        | 6798 (66.3)           | 3.36 (66.5)                        | 1.95 (1.90, 2.00)                 | 6531 (63.8)           | 3.32 (65.7)                        | 1.88 (1.84, 1.93)                 |
| yes                                       | 3269 (31.9)           | 1.46 (28.8)                        | 2.14 (2.07, 2.22)                 | 3483 (34.0)           | 1.50 (29.6)                        | 2.22 (2.15, 2.30)                 |
| Data missing                              | 185 (1.8)             | 0.24 (4.7)                         | 4.49 (3.73, 5.78)                 | 222 (2.2)             | 0.24 (4.7)                         | 5.38 (4.53, 6.66)                 |
| Urbanicity of living municipality         |                       |                                    |                                   |                       |                                    |                                   |
| Urban                                     | 7077 (69.0)           | 3.37 (66.7)                        | 2.08 (2.03, 2.13)                 | 7190 (70.2)           | 3.38 (66.8)                        | 2.09 (2.04, 2.14)                 |
| Semi Urban                                | 1588 (15.5)           | 0.86 (16.9)                        | 1.86 (1.77, 1.96)                 | 1535 (15.0)           | 0.86 (16.9)                        | 1.78 (1.69, 1.87)                 |
| Rural                                     | 1587 (15.5)           | 0.83 (16.4)                        | 1.92 (1.83, 2.02)                 | 1511 (14.8)           | 0.82 (16.2)                        | 1.88 (1.78, 1.98)                 |
| Education                                 |                       |                                    |                                   |                       |                                    |                                   |
| Lower                                     | 3350 (40.5)           | 1.20 (31.2)                        | 3.64 (3.49, 3.79)                 | 3066 (38.2)           | 1.17 (30.3)                        | 3.58 (3.43, 3.73)                 |
| Secondary                                 | 3469 (41.9)           | 1.56 (40.4)                        | 2.14 (2.06, 2.23)                 | 3532 (44.0)           | 1.58 (40.7)                        | 2.12 (2.04, 2.20)                 |
| Tertiary                                  | 1452 (17.6)           | 1.10 (28.4)                        | 1.30 (1.22, 1.39)                 | 1428 (17.8)           | 1.12 (29.0)                        | 1.30 (1.22, 1.39)                 |
| Living alone                              |                       |                                    |                                   |                       |                                    |                                   |
| No                                        | 4760 (57.6)           | 2.85 (73.6)                        | 1.64 (1.60, 1.69)                 | 4615 (57.5)           | 2.84 (73.4)                        | 1.62 (1.57, 1.67)                 |
| Yes                                       | 3511 (42.4)           | 1.02 (26.4)                        | 3.59 (3.47, 3.72)                 | 3411 (42.5)           | 1.03 (26.6)                        | 3.48 (3.36, 3.61)                 |

<sup>a</sup>Standardized to the 2013 European Standard Population by 5-year age groups.

<sup>b</sup>Total row contains the whole data; all other rows contain Finnish citizens only

**eTable 2. Annual Age-standardized Incidence Rates (IRs) of First Psychiatric Hospital Admissions<sup>a</sup> (continued)**

| Variable                                  | 2008                  |                                    |                                   | 2009                  |                                    |                                   |
|-------------------------------------------|-----------------------|------------------------------------|-----------------------------------|-----------------------|------------------------------------|-----------------------------------|
|                                           | No. of Admissions (%) | Person-years at risk, millions (%) | IR (95% CI) per 1000 Person-years | No. of Admissions (%) | Person-years at risk, millions (%) | IR (95% CI) per 1000 Person-years |
| Total <sup>b</sup>                        | 11057                 | 5.2                                | 2.11 (2.07, 2.15)                 | 10259                 | 5.22                               | 1.96 (1.92, 1.99)                 |
| Finnish citizens                          | 10767                 | 5.07                               | 2.11 (2.07, 2.15)                 | 10000                 | 5.07                               | 1.97 (1.93, 2.01)                 |
| Gender                                    |                       |                                    |                                   |                       |                                    |                                   |
| Men                                       | 5322 (49.4)           | 2.48 (48.9)                        | 2.13 (2.07, 2.19)                 | 4867 (48.7)           | 2.48 (48.9)                        | 1.96 (1.90, 2.01)                 |
| Women                                     | 5445 (50.6)           | 2.59 (51.1)                        | 2.09 (2.04, 2.15)                 | 5133 (51.3)           | 2.59 (51.1)                        | 1.98 (1.92, 2.03)                 |
| Income decile and non-dwelling population |                       |                                    |                                   |                       |                                    |                                   |
| 1 Lowest                                  | 2468 (22.9)           | 0.44 (8.8)                         | 5.58 (5.34, 5.85)                 | 2193 (21.9)           | 0.44 (8.7)                         | 4.91 (4.67, 5.16)                 |
| 2                                         | 1512 (14.0)           | 0.48 (9.6)                         | 3.53 (3.34, 3.74)                 | 1342 (13.4)           | 0.48 (9.5)                         | 3.16 (2.97, 3.36)                 |
| 3                                         | 1246 (11.6)           | 0.49 (9.7)                         | 2.68 (2.52, 2.85)                 | 1096 (11.0)           | 0.49 (9.7)                         | 2.36 (2.22, 2.52)                 |
| 4                                         | 997 (9.3)             | 0.50 (9.8)                         | 2.11 (1.98, 2.25)                 | 959 (9.6)             | 0.50 (9.8)                         | 2.00 (1.87, 2.14)                 |
| 5                                         | 884 (8.2)             | 0.50 (9.9)                         | 1.79 (1.67, 1.92)                 | 852 (8.5)             | 0.50 (9.9)                         | 1.74 (1.62, 1.87)                 |
| 6                                         | 795 (7.4)             | 0.50 (9.9)                         | 1.57 (1.45, 1.70)                 | 769 (7.7)             | 0.50 (9.9)                         | 1.50 (1.40, 1.63)                 |
| 7                                         | 680 (6.3)             | 0.50 (9.9)                         | 1.36 (1.25, 1.50)                 | 696 (7.0)             | 0.50 (9.9)                         | 1.37 (1.26, 1.50)                 |
| 8                                         | 611 (5.7)             | 0.51 (10.0)                        | 1.19 (1.08, 1.33)                 | 613 (6.1)             | 0.51 (10.0)                        | 1.27 (1.15, 1.43)                 |
| 9                                         | 554 (5.1)             | 0.51 (10.0)                        | 1.07 (0.96, 1.22)                 | 556 (5.6)             | 0.51 (10.0)                        | 1.06 (0.97, 1.21)                 |
| 10 Highest                                | 481 (4.5)             | 0.51 (10.0)                        | 1.01 (0.90, 1.16)                 | 413 (4.1)             | 0.51 (10.0)                        | 0.90 (0.79, 1.04)                 |
| Non-dwelling                              | 429 (4.0)             | 0.08 (1.6)                         | 6.47 (5.85, 7.16)                 | 404 (4.0)             | 0.08 (1.6)                         | 6.04 (5.44, 6.70)                 |
| Data missing                              | 110 (1.0)             | 0.04 (0.8)                         | 8.03 (6.32, 10.84)                | 107 (1.1)             | 0.04 (0.8)                         | 6.64 (5.24, 9.07)                 |
| Income decreased in previous three years  |                       |                                    |                                   |                       |                                    |                                   |
| No                                        | 6863 (63.7)           | 3.28 (64.7)                        | 2.01 (1.96, 2.06)                 | 6459 (64.6)           | 3.28 (64.6)                        | 1.90 (1.85, 1.95)                 |
| yes                                       | 3686 (34.2)           | 1.56 (30.7)                        | 2.28 (2.21, 2.36)                 | 3334 (33.3)           | 1.56 (30.7)                        | 2.07 (2.00, 2.14)                 |
| Data missing                              | 218 (2.0)             | 0.23 (4.6)                         | 6.43 (5.46, 7.76)                 | 207 (2.1)             | 0.24 (4.6)                         | 5.43 (4.61, 6.69)                 |
| Urbanicity of living municipality         |                       |                                    |                                   |                       |                                    |                                   |
| Urban                                     | 7520 (69.8)           | 3.40 (67.0)                        | 2.19 (2.14, 2.24)                 | 7058 (70.6)           | 3.41 (67.2)                        | 2.04 (1.99, 2.09)                 |
| Semi Urban                                | 1693 (15.7)           | 0.86 (16.9)                        | 2.02 (1.92, 2.12)                 | 1516 (15.2)           | 0.85 (16.9)                        | 1.83 (1.74, 1.92)                 |
| Rural                                     | 1554 (14.4)           | 0.81 (16.1)                        | 1.94 (1.84, 2.04)                 | 1426 (14.3)           | 0.81 (15.9)                        | 1.80 (1.71, 1.90)                 |
| Education                                 |                       |                                    |                                   |                       |                                    |                                   |
| Lower                                     | 3204 (38.2)           | 1.14 (29.4)                        | 3.87 (3.71, 4.03)                 | 2893 (37.1)           | 1.11 (28.5)                        | 3.72 (3.57, 3.89)                 |
| Secondary                                 | 3669 (43.7)           | 1.58 (40.8)                        | 2.21 (2.13, 2.29)                 | 3442 (44.2)           | 1.60 (41.2)                        | 2.03 (1.96, 2.11)                 |
| Tertiary                                  | 1523 (18.1)           | 1.16 (29.8)                        | 1.34 (1.26, 1.43)                 | 1458 (18.7)           | 1.18 (30.3)                        | 1.25 (1.18, 1.33)                 |
| Living alone                              |                       |                                    |                                   |                       |                                    |                                   |
| No                                        | 4695 (55.9)           | 2.84 (73.2)                        | 1.63 (1.59, 1.68)                 | 4375 (56.1)           | 2.84 (73.1)                        | 1.54 (1.49, 1.59)                 |
| Yes                                       | 3701 (44.1)           | 1.04 (26.8)                        | 3.77 (3.64, 3.90)                 | 3418 (43.9)           | 1.05 (26.9)                        | 3.46 (3.33, 3.58)                 |

<sup>a</sup>Standardized to the 2013 European Standard Population by 5-year age groups.

<sup>b</sup>Total row contains the whole data; all other rows contain Finnish citizens only

**eTable 2. Annual Age-standardized Incidence Rates (IRs) of First Psychiatric Hospital Admissions<sup>a</sup> (continued)**

| Variable                                  | 2010                  |                                    |                                   | 2011                  |                                    |                                   |
|-------------------------------------------|-----------------------|------------------------------------|-----------------------------------|-----------------------|------------------------------------|-----------------------------------|
|                                           | No. of Admissions (%) | Person-years at risk, millions (%) | IR (95% CI) per 1000 Person-years | No. of Admissions (%) | Person-years at risk, millions (%) | IR (95% CI) per 1000 Person-years |
| Total <sup>b</sup>                        | 9549                  | 5.23                               | 1.82 (1.78, 1.86)                 | 9362                  | 5.25                               | 1.78 (1.74, 1.81)                 |
| Finnish citizens                          | 9279                  | 5.08                               | 1.83 (1.79, 1.86)                 | 9086                  | 5.08                               | 1.79 (1.75, 1.82)                 |
| Gender                                    |                       |                                    |                                   |                       |                                    |                                   |
| Men                                       | 4410 (47.5)           | 2.48 (48.9)                        | 1.77 (1.71, 1.82)                 | 4314 (47.5)           | 2.49 (48.9)                        | 1.73 (1.68, 1.78)                 |
| Women                                     | 4869 (52.5)           | 2.59 (51.1)                        | 1.88 (1.82, 1.93)                 | 4772 (52.5)           | 2.59 (51.1)                        | 1.84 (1.79, 1.89)                 |
| Income decile and non-dwelling population |                       |                                    |                                   |                       |                                    |                                   |
| 1 Lowest                                  | 2110 (22.7)           | 0.44 (8.7)                         | 4.66 (4.42, 4.91)                 | 1935 (21.3)           | 0.44 (8.6)                         | 4.24 (4.01, 4.48)                 |
| 2                                         | 1254 (13.5)           | 0.48 (9.5)                         | 2.85 (2.68, 3.03)                 | 1274 (14.0)           | 0.48 (9.5)                         | 2.93 (2.75, 3.12)                 |
| 3                                         | 1096 (11.8)           | 0.49 (9.7)                         | 2.33 (2.18, 2.48)                 | 1067 (11.7)           | 0.49 (9.7)                         | 2.25 (2.11, 2.40)                 |
| 4                                         | 813 (8.8)             | 0.50 (9.8)                         | 1.70 (1.58, 1.83)                 | 850 (9.4)             | 0.50 (9.8)                         | 1.75 (1.63, 1.88)                 |
| 5                                         | 734 (7.9)             | 0.50 (9.9)                         | 1.47 (1.36, 1.59)                 | 726 (8.0)             | 0.50 (9.9)                         | 1.46 (1.35, 1.58)                 |
| 6                                         | 700 (7.5)             | 0.50 (9.9)                         | 1.41 (1.30, 1.53)                 | 713 (7.8)             | 0.50 (9.9)                         | 1.42 (1.31, 1.54)                 |
| 7                                         | 642 (6.9)             | 0.51 (10.0)                        | 1.25 (1.15, 1.38)                 | 608 (6.7)             | 0.51 (10.0)                        | 1.19 (1.09, 1.31)                 |
| 8                                         | 567 (6.1)             | 0.51 (10.0)                        | 1.14 (1.03, 1.27)                 | 526 (5.8)             | 0.51 (10.0)                        | 1.07 (0.96, 1.20)                 |
| 9                                         | 511 (5.5)             | 0.51 (10.0)                        | 1.06 (0.94, 1.21)                 | 503 (5.5)             | 0.51 (10.0)                        | 1.00 (0.90, 1.14)                 |
| 10 Highest                                | 361 (3.9)             | 0.51 (10.0)                        | 0.76 (0.66, 0.89)                 | 402 (4.4)             | 0.51 (10.1)                        | 0.90 (0.80, 1.04)                 |
| Non-dwelling                              | 364 (3.9)             | 0.08 (1.6)                         | 5.49 (4.92, 6.13)                 | 350 (3.9)             | 0.08 (1.6)                         | 5.26 (4.70, 5.89)                 |
| Data missing                              | 127 (1.4)             | 0.04 (0.9)                         | 8.00 (6.25, 10.53)                | 132 (1.5)             | 0.04 (0.9)                         | 7.11 (5.74, 9.19)                 |
| Income decreased in previous three years  |                       |                                    |                                   |                       |                                    |                                   |
| No                                        | 6141 (66.2)           | 3.43 (67.6)                        | 1.74 (1.70, 1.78)                 | 6014 (66.2)           | 3.46 (68.1)                        | 1.70 (1.65, 1.74)                 |
| yes                                       | 2941 (31.7)           | 1.41 (27.7)                        | 1.96 (1.89, 2.04)                 | 2853 (31.4)           | 1.38 (27.2)                        | 1.93 (1.86, 2.01)                 |
| Data missing                              | 197 (2.1)             | 0.24 (4.7)                         | 5.32 (4.46, 6.62)                 | 219 (2.4)             | 0.24 (4.7)                         | 5.66 (4.84, 6.91)                 |
| Urbanicity of living municipality         |                       |                                    |                                   |                       |                                    |                                   |
| Urban                                     | 6521 (70.3)           | 3.42 (67.4)                        | 1.88 (1.84, 1.93)                 | 6432 (70.8)           | 3.43 (67.5)                        | 1.85 (1.81, 1.90)                 |
| Semi Urban                                | 1467 (15.8)           | 0.85 (16.8)                        | 1.76 (1.67, 1.86)                 | 1378 (15.2)           | 0.85 (16.8)                        | 1.67 (1.58, 1.76)                 |
| Rural                                     | 1291 (13.9)           | 0.80 (15.8)                        | 1.67 (1.58, 1.77)                 | 1276 (14.0)           | 0.80 (15.7)                        | 1.64 (1.55, 1.74)                 |
| Education                                 |                       |                                    |                                   |                       |                                    |                                   |
| Lower                                     | 2637 (36.7)           | 1.08 (27.7)                        | 3.42 (3.27, 3.58)                 | 2464 (35.4)           | 1.05 (26.8)                        | 3.25 (3.10, 3.41)                 |
| Secondary                                 | 3199 (44.5)           | 1.62 (41.5)                        | 1.90 (1.83, 1.97)                 | 3103 (44.6)           | 1.64 (41.9)                        | 1.80 (1.73, 1.87)                 |
| Tertiary                                  | 1345 (18.7)           | 1.20 (30.8)                        | 1.14 (1.07, 1.21)                 | 1393 (20.0)           | 1.23 (31.3)                        | 1.11 (1.05, 1.18)                 |
| Living alone                              |                       |                                    |                                   |                       |                                    |                                   |
| No                                        | 4087 (56.9)           | 2.85 (73.0)                        | 1.44 (1.39, 1.48)                 | 4007 (57.6)           | 2.85 (72.8)                        | 1.41 (1.37, 1.46)                 |
| Yes                                       | 3094 (43.1)           | 1.05 (27.0)                        | 3.05 (2.94, 3.17)                 | 2953 (42.4)           | 1.06 (27.2)                        | 2.92 (2.80, 3.03)                 |

<sup>a</sup>Standardized to the 2013 European Standard Population by 5-year age groups.

<sup>b</sup>Total row contains the whole data; all other rows contain Finnish citizens only

**eTable 2. Annual Age-standardized Incidence Rates (IRs) of First Psychiatric Hospital Admissions<sup>a</sup> (continued)**

| Variable                                  | 2012                  |                                    |                                   | 2013                  |                                    |                                   |
|-------------------------------------------|-----------------------|------------------------------------|-----------------------------------|-----------------------|------------------------------------|-----------------------------------|
|                                           | No. of Admissions (%) | Person-years at risk, millions (%) | IR (95% CI) per 1000 Person-years | No. of Admissions (%) | Person-years at risk, millions (%) | IR (95% CI) per 1000 Person-years |
| Total <sup>b</sup>                        | 9346                  | 5.27                               | 1.77 (1.74, 1.81)                 | 8643                  | 5.29                               | 1.64 (1.60, 1.67)                 |
| Finnish citizens                          | 9044                  | 5.09                               | 1.78 (1.75, 1.82)                 | 8346                  | 5.1                                | 1.65 (1.61, 1.68)                 |
| Gender                                    |                       |                                    |                                   |                       |                                    |                                   |
| Men                                       | 4135 (45.7)           | 2.49 (49.0)                        | 1.65 (1.60, 1.71)                 | 3822 (45.8)           | 2.50 (49.0)                        | 1.52 (1.47, 1.57)                 |
| Women                                     | 4909 (54.3)           | 2.60 (51.0)                        | 1.90 (1.85, 1.95)                 | 4524 (54.2)           | 2.60 (51.0)                        | 1.76 (1.71, 1.81)                 |
| Income decile and non-dwelling population |                       |                                    |                                   |                       |                                    |                                   |
| 1 Lowest                                  | 2029 (22.4)           | 0.43 (8.5)                         | 4.68 (4.44, 4.94)                 | 1847 (22.1)           | 0.43 (8.5)                         | 4.10 (3.88, 4.34)                 |
| 2                                         | 1266 (14.0)           | 0.48 (9.5)                         | 3.01 (2.83, 3.21)                 | 1132 (13.6)           | 0.48 (9.4)                         | 2.61 (2.45, 2.79)                 |
| 3                                         | 1030 (11.4)           | 0.49 (9.7)                         | 2.27 (2.13, 2.43)                 | 958 (11.5)            | 0.49 (9.7)                         | 2.08 (1.94, 2.23)                 |
| 4                                         | 834 (9.2)             | 0.50 (9.8)                         | 1.74 (1.62, 1.87)                 | 795 (9.5)             | 0.50 (9.8)                         | 1.61 (1.49, 1.73)                 |
| 5                                         | 733 (8.1)             | 0.50 (9.9)                         | 1.48 (1.37, 1.60)                 | 694 (8.3)             | 0.50 (9.9)                         | 1.40 (1.29, 1.51)                 |
| 6                                         | 692 (7.7)             | 0.51 (9.9)                         | 1.37 (1.26, 1.49)                 | 609 (7.3)             | 0.51 (9.9)                         | 1.21 (1.12, 1.33)                 |
| 7                                         | 594 (6.6)             | 0.51 (10.0)                        | 1.16 (1.06, 1.28)                 | 573 (6.9)             | 0.51 (10.0)                        | 1.13 (1.03, 1.24)                 |
| 8                                         | 559 (6.2)             | 0.51 (10.0)                        | 1.13 (1.03, 1.27)                 | 488 (5.8)             | 0.51 (10.0)                        | 0.98 (0.89, 1.11)                 |
| 9                                         | 428 (4.7)             | 0.51 (10.1)                        | 0.90 (0.80, 1.04)                 | 440 (5.3)             | 0.51 (10.1)                        | 0.92 (0.82, 1.05)                 |
| 10 Highest                                | 426 (4.7)             | 0.51 (10.1)                        | 0.95 (0.84, 1.09)                 | 366 (4.4)             | 0.52 (10.1)                        | 0.83 (0.72, 0.96)                 |
| Non-dwelling                              | 340 (3.8)             | 0.09 (1.7)                         | 4.79 (4.27, 5.38)                 | 330 (4.0)             | 0.09 (1.7)                         | 4.56 (4.06, 5.13)                 |
| Data missing                              | 113 (1.2)             | 0.04 (0.9)                         | 6.61 (4.97, 9.93)                 | 114 (1.4)             | 0.04 (0.9)                         | 6.09 (4.48, 9.26)                 |
| Income decreased in previous three years  |                       |                                    |                                   |                       |                                    |                                   |
| No                                        | 6012 (66.5)           | 3.46 (68.0)                        | 1.70 (1.65, 1.74)                 | 5456 (65.4)           | 3.37 (66.2)                        | 1.57 (1.53, 1.62)                 |
| yes                                       | 2851 (31.5)           | 1.39 (27.3)                        | 1.93 (1.86, 2.01)                 | 2690 (32.2)           | 1.48 (29.1)                        | 1.75 (1.68, 1.82)                 |
| Data missing                              | 181 (2.0)             | 0.24 (4.7)                         | 5.34 (4.37, 6.67)                 | 200 (2.4)             | 0.24 (4.7)                         | 4.76 (4.00, 5.83)                 |
| Urbanicity of living municipality         |                       |                                    |                                   |                       |                                    |                                   |
| Urban                                     | 6406 (70.8)           | 3.45 (67.8)                        | 1.84 (1.79, 1.88)                 | 5960 (71.4)           | 3.46 (68.0)                        | 1.70 (1.66, 1.75)                 |
| Semi Urban                                | 1411 (15.6)           | 0.85 (16.8)                        | 1.72 (1.63, 1.81)                 | 1275 (15.3)           | 0.85 (16.7)                        | 1.57 (1.48, 1.66)                 |
| Rural                                     | 1227 (13.6)           | 0.79 (15.5)                        | 1.62 (1.53, 1.72)                 | 1111 (13.3)           | 0.78 (15.3)                        | 1.49 (1.40, 1.59)                 |
| Education                                 |                       |                                    |                                   |                       |                                    |                                   |
| Lower                                     | 2329 (33.7)           | 1.02 (26.0)                        | 3.23 (3.07, 3.39)                 | 2064 (32.9)           | 0.98 (25.0)                        | 2.90 (2.76, 3.06)                 |
| Secondary                                 | 3195 (46.2)           | 1.66 (42.3)                        | 1.83 (1.76, 1.90)                 | 2913 (46.4)           | 1.68 (42.5)                        | 1.65 (1.59, 1.72)                 |
| Tertiary                                  | 1397 (20.2)           | 1.25 (31.8)                        | 1.13 (1.06, 1.20)                 | 1300 (20.7)           | 1.28 (32.5)                        | 1.03 (0.96, 1.09)                 |
| Living alone                              |                       |                                    |                                   |                       |                                    |                                   |
| No                                        | 3891 (56.2)           | 2.86 (72.7)                        | 1.38 (1.33, 1.42)                 | 3449 (54.9)           | 2.85 (72.5)                        | 1.23 (1.19, 1.27)                 |
| Yes                                       | 3030 (43.8)           | 1.07 (27.3)                        | 2.97 (2.86, 3.09)                 | 2828 (45.1)           | 1.08 (27.5)                        | 2.68 (2.58, 2.79)                 |

<sup>a</sup>Standardized to the 2013 European Standard Population by 5-year age groups.

<sup>b</sup>Total row contains the whole data; all other rows contain Finnish citizens only

**eTable 2. Annual Age-standardized Incidence Rates (IRs) of First Psychiatric Hospital Admissions<sup>a</sup> (continued)**

| Variable                                                                                     | 2014                  |                                    |                                   |
|----------------------------------------------------------------------------------------------|-----------------------|------------------------------------|-----------------------------------|
|                                                                                              | No. of Admissions (%) | Person-years at risk, millions (%) | IR (95% CI) per 1000 Person-years |
| Total <sup>b</sup>                                                                           | 8387                  | 5.31                               | 1.59 (1.56, 1.62)                 |
| Finnish citizens                                                                             | 8056                  | 5.1                                | 1.59 (1.56, 1.63)                 |
| Gender                                                                                       |                       |                                    |                                   |
| Men                                                                                          | 3832 (47.6)           | 2.50 (49.0)                        | 1.54 (1.49, 1.59)                 |
| Women                                                                                        | 4224 (52.4)           | 2.60 (51.0)                        | 1.65 (1.60, 1.70)                 |
| Income decile and non-dwelling population                                                    |                       |                                    |                                   |
| 1 Lowest                                                                                     | 1804 (22.4)           | 0.43 (8.5)                         | 4.03 (3.80, 4.27)                 |
| 2                                                                                            | 1116 (13.9)           | 0.48 (9.4)                         | 2.62 (2.45, 2.80)                 |
| 3                                                                                            | 909 (11.3)            | 0.49 (9.7)                         | 1.95 (1.82, 2.10)                 |
| 4                                                                                            | 776 (9.6)             | 0.50 (9.8)                         | 1.63 (1.51, 1.75)                 |
| 5                                                                                            | 662 (8.2)             | 0.50 (9.9)                         | 1.32 (1.22, 1.43)                 |
| 6                                                                                            | 579 (7.2)             | 0.51 (9.9)                         | 1.15 (1.05, 1.25)                 |
| 7                                                                                            | 564 (7.0)             | 0.51 (10.0)                        | 1.11 (1.02, 1.22)                 |
| 8                                                                                            | 482 (6.0)             | 0.51 (10.0)                        | 0.97 (0.88, 1.09)                 |
| 9                                                                                            | 382 (4.7)             | 0.51 (10.1)                        | 0.79 (0.70, 0.91)                 |
| 10 Highest                                                                                   | 338 (4.2)             | 0.52 (10.1)                        | 0.73 (0.64, 0.84)                 |
| Non-dwelling                                                                                 | 323 (4.0)             | 0.09 (1.7)                         | 4.60 (4.09, 5.19)                 |
| Data missing                                                                                 | 121 (1.5)             | 0.04 (0.8)                         | 6.22 (4.96, 9.58)                 |
| Income decreased in previous three years                                                     |                       |                                    |                                   |
| No                                                                                           | 5313 (66.0)           | 3.45 (67.7)                        | 1.51 (1.47, 1.56)                 |
| yes                                                                                          | 2534 (31.5)           | 1.41 (27.7)                        | 1.72 (1.65, 1.79)                 |
| Data missing                                                                                 | 209 (2.6)             | 0.24 (4.6)                         | 4.93 (4.20, 5.95)                 |
| Urbanicity of living municipality                                                            |                       |                                    |                                   |
| Urban                                                                                        | 5727 (71.1)           | 3.48 (68.3)                        | 1.63 (1.59, 1.67)                 |
| Semi Urban                                                                                   | 1249 (15.5)           | 0.85 (16.6)                        | 1.55 (1.46, 1.64)                 |
| Rural                                                                                        | 1080 (13.4)           | 0.77 (15.1)                        | 1.50 (1.40, 1.59)                 |
| Education                                                                                    |                       |                                    |                                   |
| Lower                                                                                        | 1974 (32.1)           | 0.95 (24.1)                        | 3.10 (2.94, 3.27)                 |
| Secondary                                                                                    | 2913 (47.4)           | 1.70 (43.0)                        | 1.63 (1.56, 1.69)                 |
| Tertiary                                                                                     | 1259 (20.5)           | 1.30 (33.0)                        | 0.98 (0.92, 1.05)                 |
| Living alone                                                                                 |                       |                                    |                                   |
| No                                                                                           | 3424 (55.7)           | 2.86 (72.3)                        | 1.22 (1.18, 1.26)                 |
| Yes                                                                                          | 2722 (44.3)           | 1.10 (27.7)                        | 2.62 (2.52, 2.73)                 |
| <sup>a</sup> Standardized to the 2013 European Standard Population by 5-year age groups.     |                       |                                    |                                   |
| <sup>b</sup> Total row contains the whole data; all other rows contain Finnish citizens only |                       |                                    |                                   |

**eTable 3. Joinpoint Analysis of Sex- and Income-Specific Age-Standardized Incidence Rates of First Psychiatric Hospital Admissions With Diagnosis of Mental and Behavioural Disorders Due to Psychoactive Substance Use<sup>a</sup>**

| ICD-10 Diagnoses<br>F10-F19                                                                                                                                                      | Segment          |                       |                  |                        |                  |                        |                  |                        | Total follow-up<br>period |
|----------------------------------------------------------------------------------------------------------------------------------------------------------------------------------|------------------|-----------------------|------------------|------------------------|------------------|------------------------|------------------|------------------------|---------------------------|
|                                                                                                                                                                                  | 1                |                       | 2                |                        | 3                |                        | 4                |                        | 1996-2014                 |
|                                                                                                                                                                                  | Segment<br>Start | APC (95% CI)          | Segment<br>Start | APC (95% CI)           | Segment<br>Start | APC (95% CI)           | Segment<br>Start | APC (95% CI)           | AAPC (95% CI)             |
| <b>Overall trends</b>                                                                                                                                                            |                  |                       |                  |                        |                  |                        |                  |                        |                           |
| Total                                                                                                                                                                            | 1996             | 4.04 (2.37, 5.73)     | 2000             | -2.92 (-7.67, 2.07)    | 2003             | 2.44 (0.84, 4.07)      | 2008             | -8.8 (-9.69, -7.91)    | -2.0 (-2.87, -1.11)       |
| Men                                                                                                                                                                              | 1996             | 3.16 (1.13, 5.22)     | 2000             | -3.58 (-9.43, 2.64)    | 2003             | 2.38 (0.39, 4.41)      | 2008             | -9.54 (-10.64, -8.43)  | -2.57 (-3.66, -1.47)      |
| Women                                                                                                                                                                            | 1996             | 5.39 (2.22, 8.67)     | 2001             | -1.11 (-7.24, 5.43)    | 2005             | 4.62 (-7.81, 18.73)    | 2008             | -7.44 (-9.63, -5.2)    | -0.61 (-2.95, 1.78)       |
| <b>Income-specific trends</b>                                                                                                                                                    |                  |                       |                  |                        |                  |                        |                  |                        |                           |
| <b>Men</b>                                                                                                                                                                       |                  |                       |                  |                        |                  |                        |                  |                        |                           |
| Non-dwelling population                                                                                                                                                          | 1996             | 0.74 (-1.37, 2.9)     | 2005             | 13.43 (-6.95, 38.28)   | 2008             | -13.24 (-16.57, -9.79) |                  |                        | -2.24 (-5.41, 1.04)       |
| 1 Lowest decile                                                                                                                                                                  | 1996             | 1.73 (0.45, 3.03)     | 2008             | -9.34 (-13.11, -5.41)  |                  |                        |                  |                        | -2.1 (-3.57, -0.62)       |
| 2                                                                                                                                                                                | 1996             | 3.22 (1.7, 4.77)      | 2007             | -8.95 (-12.04, -5.76)  |                  |                        |                  |                        | -1.69 (-3.14, -0.23)      |
| 3                                                                                                                                                                                | 1996             | 1.22 (-0.52, 2.99)    | 2008             | -11.02 (-16.45, -5.24) |                  |                        |                  |                        | -3.03 (-5.13, -0.89)      |
| 4                                                                                                                                                                                | 1996             | 0.85 (-1.1, 2.83)     | 2008             | -10.94 (-16.67, -4.82) |                  |                        |                  |                        | -3.25 (-5.49, -0.95)      |
| 5                                                                                                                                                                                | 1996             | 0.08 (-1.05, 1.22)    | 2009             | -16.61 (-34.47, 6.12)  | 2012             | 1.37 (-23.33, 34.03)   |                  |                        | -2.78 (-7.13, 1.78)       |
| 6                                                                                                                                                                                | 1996             | 16.02 (-10.63, 50.61) | 1998             | -2.72 (-7.72, 2.54)    | 2004             | 6.54 (-15.21, 33.86)   | 2007             | -11.36 (-14.68, -7.92) | -2.86 (-7.15, 1.62)       |
| 7                                                                                                                                                                                | 1996             | -0.55 (-1.65, 0.56)   | 2010             | -14.94 (-22.76, -6.32) |                  |                        |                  |                        | -3.94 (-5.95, -1.89)      |
| 8                                                                                                                                                                                | 1996             | -0.91 (-2.84, 1.06)   | 2008             | -9.67 (-15.63, -3.29)  |                  |                        |                  |                        | -3.92 (-6.2, -1.59)       |
| 9                                                                                                                                                                                | 1996             | 14.65 (-3.11, 35.67)  | 1999             | -10.47 (-19.34, 0.64)  | 2004             | 12.09 (-19.18, 55.46)  | 2007             | -10.7 (-15.34, -5.8)   | -3.24 (-8.9, 2.77)        |
| 10 Highest decile                                                                                                                                                                | 1996             | -4.56 (-5.75, -3.36)  |                  |                        |                  |                        |                  |                        | -4.56 (-5.75, -3.36)      |
| Abbreviations: APC, Annual percentage change; AAPC Average annual percentage change.<br><sup>a</sup> Standardized to the 2013 European Standard Population by 5-year age groups. |                  |                       |                  |                        |                  |                        |                  |                        |                           |

**eTable 3. Joinpoint Analysis of Gender- and Income-specific Age-standardized Incidence Rates of First Psychiatric Hospital Admissions with Diagnosis of Mental and Behavioural Disorders Due to Psychoactive Substance Use <sup>a</sup>(continued)**

| ICD-10 Diagnoses<br>F10-F19                                                                                                                                                      | Segment          |                      |                  |                        |                  |                       |                  |              | Total follow-up<br>period |
|----------------------------------------------------------------------------------------------------------------------------------------------------------------------------------|------------------|----------------------|------------------|------------------------|------------------|-----------------------|------------------|--------------|---------------------------|
|                                                                                                                                                                                  | 1                |                      | 2                |                        | 3                |                       | 4                |              | 1996-2014                 |
|                                                                                                                                                                                  | Segment<br>Start | APC (95% CI)         | Segment<br>Start | APC (95% CI)           | Segment<br>Start | APC (95% CI)          | Segment<br>Start | APC (95% CI) | AAPC (95% CI)             |
| <b>Women</b>                                                                                                                                                                     |                  |                      |                  |                        |                  |                       |                  |              |                           |
| Non-dwelling population                                                                                                                                                          | 1996             | -2.97 (-10.79, 5.54) | 2003             | 19.2 (1.8, 39.58)      | 2008             | -9.93 (-16.75, -2.55) |                  |              | 0.22 (-5.05, 5.78)        |
| 1 Lowest decile                                                                                                                                                                  | 1996             | 4.01 (1.95, 6.12)    | 2008             | -7.8 (-13.08, -2.21)   |                  |                       |                  |              | -0.09 (-2.23, 2.11)       |
| 2                                                                                                                                                                                | 1996             | 2.74 (1.01, 4.5)     | 2008             | -9.12 (-13.86, -4.12)  |                  |                       |                  |              | -1.38 (-3.26, 0.55)       |
| 3                                                                                                                                                                                | 1996             | 1.13 (-1.58, 3.91)   | 2006             | -4.68 (-8.7, -0.48)    |                  |                       |                  |              | -1.5 (-3.67, 0.72)        |
| 4                                                                                                                                                                                | 1996             | 2.16 (-0.02, 4.38)   | 2009             | -10.52 (-19.36, -0.71) |                  |                       |                  |              | -1.53 (-4.44, 1.46)       |
| 5                                                                                                                                                                                | 1996             | 2.89 (0.64, 5.2)     | 2008             | -10.6 (-16.6, -4.16)   |                  |                       |                  |              | -1.82 (-4.25, 0.68)       |
| 6                                                                                                                                                                                | 1996             | -1.07 (-3.09, 0.99)  |                  |                        |                  |                       |                  |              | -1.07 (-3.09, 0.99)       |
| 7                                                                                                                                                                                | 1996             | 15.81 (-2.51, 37.59) | 2000             | -2.58 (-4.78, -0.33)   |                  |                       |                  |              | 1.24 (-2.59, 5.22)        |
| 8                                                                                                                                                                                | 1996             | 9.32 (-5.21, 26.07)  | 2001             | -3.55 (-6.94, -0.03)   |                  |                       |                  |              | -0.13 (-4.36, 4.28)       |
| 9                                                                                                                                                                                | 1996             | 0.71 (-1.65, 3.13)   | 2010             | -15.4 (-31.81, 4.96)   |                  |                       |                  |              | -3.12 (-7.56, 1.54)       |
| 10 Highest decile                                                                                                                                                                | 1996             | -4.22 (-6.22, -2.17) |                  |                        |                  |                       |                  |              | -4.22 (-6.22, -2.17)      |
| Abbreviations: APC, Annual percentage change; AAPC Average annual percentage change.<br><sup>a</sup> Standardized to the 2013 European Standard Population by 5-year age groups. |                  |                      |                  |                        |                  |                       |                  |              |                           |

**eTable 4. Joinpoint Analysis of Sex- and Income-Specific Age-Standardized Incidence Rates of First Psychiatric Hospital Admissions With Diagnosis of Schizophrenia, Schizotypal and Delusional Disorders<sup>a</sup>**

| ICD-10 Diagnoses<br>F20-F29                                                                                                                                                      | Segment          |                        |                  |                       |                  |                      |                  |                    | Total follow-up<br>period |
|----------------------------------------------------------------------------------------------------------------------------------------------------------------------------------|------------------|------------------------|------------------|-----------------------|------------------|----------------------|------------------|--------------------|---------------------------|
|                                                                                                                                                                                  | 1                |                        | 2                |                       | 3                |                      | 4                |                    | 1996-2014                 |
|                                                                                                                                                                                  | Segment<br>Start | APC (95% CI)           | Segment<br>Start | APC (95% CI)          | Segment<br>Start | APC (95% CI)         | Segment<br>Start | APC (95% CI)       | AAPC (95% CI)             |
| <b>Overall trends</b>                                                                                                                                                            |                  |                        |                  |                       |                  |                      |                  |                    |                           |
| Total                                                                                                                                                                            | 1996             | -2.9 (-13.27, 8.7)     | 1998             | 3.22 (-0.27, 6.84)    | 2003             | -2.46 (-3.19, -1.72) |                  |                    | -0.96 (-2.4, 0.5)         |
| Men                                                                                                                                                                              | 1996             | -4.75 (-16.1, 8.12)    | 1998             | 5.71 (-0.44, 12.24)   | 2002             | -2.25 (-3.49, -1.0)  | 2011             | 0.88 (-4.87, 6.98) | -0.3 (-2.2, 1.64)         |
| Women                                                                                                                                                                            | 1996             | 1.52 (0.1, 2.96)       | 2004             | -3.12 (-4.14, -2.09)  |                  |                      |                  |                    | -1.08 (-1.86, -0.3)       |
| <b>Income-specific trends</b>                                                                                                                                                    |                  |                        |                  |                       |                  |                      |                  |                    |                           |
| <b>Men</b>                                                                                                                                                                       |                  |                        |                  |                       |                  |                      |                  |                    |                           |
| Non-dwelling population                                                                                                                                                          | 1996             | 1.33 (-0.37, 3.05)     |                  |                       |                  |                      |                  |                    | 1.33 (-0.37, 3.05)        |
| 1 Lowest decile                                                                                                                                                                  | 1996             | 5.16 (1.12, 9.36)      | 2003             | -0.88 (-2.64, 0.92)   |                  |                      |                  |                    | 1.43 (-0.3, 3.18)         |
| 2                                                                                                                                                                                | 1996             | -12.06 (-31.09, 12.24) | 1998             | 10.48 (-2.82, 25.61)  | 2002             | -1.92 (-3.37, -0.45) |                  |                    | -0.5 (-4.03, 3.16)        |
| 3                                                                                                                                                                                | 1996             | -11.29 (-30.57, 13.34) | 1998             | 4.92 (0.69, 9.31)     | 2005             | -4.42 (-6.65, -2.13) |                  |                    | -1.71 (-4.61, 1.29)       |
| 4                                                                                                                                                                                | 1996             | -1.34 (-2.65, -0.02)   |                  |                       |                  |                      |                  |                    | -1.34 (-2.65, -0.02)      |
| 5                                                                                                                                                                                | 1996             | -1.27 (-2.32, -0.21)   |                  |                       |                  |                      |                  |                    | -1.27 (-2.32, -0.21)      |
| 6                                                                                                                                                                                | 1996             | -1.56 (-3.1, 0.01)     |                  |                       |                  |                      |                  |                    | -1.56 (-3.1, 0.01)        |
| 7                                                                                                                                                                                | 1996             | -1.81 (-3.33, -0.25)   | 2012             | 16.74 (-25.09, 81.94) |                  |                      |                  |                    | 0.1 (-4.48, 4.9)          |
| 8                                                                                                                                                                                | 1996             | -1.04 (-2.38, 0.32)    |                  |                       |                  |                      |                  |                    | -1.04 (-2.38, 0.32)       |
| 9                                                                                                                                                                                | 1996             | -0.82 (-2.39, 0.78)    |                  |                       |                  |                      |                  |                    | -0.82 (-2.39, 0.78)       |
| 10 Highest decile                                                                                                                                                                | 1996             | -0.69 (-2.38, 1.03)    |                  |                       |                  |                      |                  |                    | -0.69 (-2.38, 1.03)       |
| Abbreviations: APC, Annual percentage change; AAPC Average annual percentage change.<br><sup>a</sup> Standardized to the 2013 European Standard Population by 5-year age groups. |                  |                        |                  |                       |                  |                      |                  |                    |                           |



**eTable 4. Joinpoint Analysis of Gender- and Income-specific Age-standardized Incidence Rates of First Psychiatric Hospital Admissions with Diagnosis of Schizophrenia, Schizotypal and Delusional Disorders <sup>a</sup> (continued)**

| ICD-10 Diagnoses<br>F20-F29                                                                                                                                                      | Segment          |                      |                  |                      |                  |              |                  |              | Total follow-up<br>period |
|----------------------------------------------------------------------------------------------------------------------------------------------------------------------------------|------------------|----------------------|------------------|----------------------|------------------|--------------|------------------|--------------|---------------------------|
|                                                                                                                                                                                  | 1                |                      | 2                |                      | 3                |              | 4                |              | 1996-2014                 |
|                                                                                                                                                                                  | Segment<br>Start | APC (95% CI)         | Segment<br>Start | APC (95% CI)         | Segment<br>Start | APC (95% CI) | Segment<br>Start | APC (95% CI) | AAPC (95% CI)             |
| <b>Women</b>                                                                                                                                                                     |                  |                      |                  |                      |                  |              |                  |              |                           |
| Non-dwelling population                                                                                                                                                          | 1996             | 0.99 (-1.19, 3.21)   |                  |                      |                  |              |                  |              | 0.99 (-1.19, 3.21)        |
| 1 Lowest decile                                                                                                                                                                  | 1996             | 3.29 (1.28, 5.35)    | 2006             | -3.81 (-6.44, -1.1)  |                  |              |                  |              | 0.07 (-1.42, 1.59)        |
| 2                                                                                                                                                                                | 1996             | 2.78 (0.64, 4.97)    | 2005             | -2.62 (-4.64, -0.56) |                  |              |                  |              | 0.04 (-1.31, 1.41)        |
| 3                                                                                                                                                                                | 1996             | -2.1 (-3.09, -1.09)  |                  |                      |                  |              |                  |              | -2.1 (-3.09, -1.09)       |
| 4                                                                                                                                                                                | 1996             | -2.05 (-3.19, -0.9)  |                  |                      |                  |              |                  |              | -2.05 (-3.19, -0.9)       |
| 5                                                                                                                                                                                | 1996             | 2.72 (-2.08, 7.77)   | 2004             | -5.08 (-8.17, -1.9)  |                  |              |                  |              | -1.69 (-4.18, 0.87)       |
| 6                                                                                                                                                                                | 1996             | 1.45 (-1.97, 4.99)   | 2005             | -6.29 (-9.46, -3.0)  |                  |              |                  |              | -2.5 (-4.64, -0.31)       |
| 7                                                                                                                                                                                | 1996             | -1.16 (-2.62, 0.32)  |                  |                      |                  |              |                  |              | -1.16 (-2.62, 0.32)       |
| 8                                                                                                                                                                                | 1996             | -1.28 (-2.92, 0.39)  |                  |                      |                  |              |                  |              | -1.28 (-2.92, 0.39)       |
| 9                                                                                                                                                                                | 1996             | -0.56 (-2.41, 1.32)  |                  |                      |                  |              |                  |              | -0.56 (-2.41, 1.32)       |
| 10 Highest decile                                                                                                                                                                | 1996             | -1.94 (-3.72, -0.12) |                  |                      |                  |              |                  |              | -1.94 (-3.72, -0.12)      |
| Abbreviations: APC, Annual percentage change; AAPC Average annual percentage change.<br><sup>a</sup> Standardized to the 2013 European Standard Population by 5-year age groups. |                  |                      |                  |                      |                  |              |                  |              |                           |

**eTable 5. Joinpoint Analysis of Sex- and Income-Specific Age-Standardized Incidence Rates of First Psychiatric Hospital Admissions With Diagnosis of Mood Disorders<sup>a</sup>**

| ICD-10 Diagnoses<br>F30-F39                                                                                                                                                      | Segment          |                      |                  |                       |                  |                       |                  |                       | Total follow-up<br>period |
|----------------------------------------------------------------------------------------------------------------------------------------------------------------------------------|------------------|----------------------|------------------|-----------------------|------------------|-----------------------|------------------|-----------------------|---------------------------|
|                                                                                                                                                                                  | 1                |                      | 2                |                       | 3                |                       | 4                |                       | 1996-2014                 |
|                                                                                                                                                                                  | Segment<br>Start | APC (95% CI)         | Segment<br>Start | APC (95% CI)          | Segment<br>Start | APC (95% CI)          | Segment<br>Start | APC (95% CI)          | AAPC (95% CI)             |
| <b>Overall trends</b>                                                                                                                                                            |                  |                      |                  |                       |                  |                       |                  |                       |                           |
| Total                                                                                                                                                                            | 1996             | 4.53 (2.27, 6.84)    | 2000             | 0.72 (-0.13, 1.58)    | 2008             | -3.52 (-4.6, -2.42)   |                  |                       | 0.11 (-0.53, 0.76)        |
| Men                                                                                                                                                                              | 1996             | 0.61 (-0.23, 1.47)   | 2008             | -3.97 (-6.26, -1.63)  |                  |                       |                  |                       | -0.94 (-1.82, -0.05)      |
| Women                                                                                                                                                                            | 1996             | 7.1 (3.99, 10.32)    | 2000             | 1.18 (0.06, 2.31)     | 2008             | -3.37 (-4.79, -1.93)  |                  |                       | 0.91 (0.05, 1.77)         |
| <b>Income-specific trends</b>                                                                                                                                                    |                  |                      |                  |                       |                  |                       |                  |                       |                           |
| <b>Men</b>                                                                                                                                                                       |                  |                      |                  |                       |                  |                       |                  |                       |                           |
| Non-dwelling population                                                                                                                                                          | 1996             | 0.76 (-4.25, 6.02)   | 2005             | 14.33 (-9.0, 43.64)   | 2009             | -19.18 (-49.25, 28.7) | 2012             | 13.85 (-30.99, 87.83) | 1.25 (-7.87, 11.27)       |
| 1 Lowest decile                                                                                                                                                                  | 1996             | 1.25 (0.21, 2.3)     |                  |                       |                  |                       |                  |                       | 1.25 (0.21, 2.3)          |
| 2                                                                                                                                                                                | 1996             | 2.45 (0.95, 3.98)    | 2008             | -3.05 (-7.17, 1.25)   |                  |                       |                  |                       | 0.58 (-1.01, 2.21)        |
| 3                                                                                                                                                                                | 1996             | 1.39 (0.17, 2.62)    | 2008             | -5.32 (-8.81, -1.7)   |                  |                       |                  |                       | -0.9 (-2.24, 0.46)        |
| 4                                                                                                                                                                                | 1996             | 0.97 (-0.29, 2.24)   | 2007             | -4.29 (-6.77, -1.74)  |                  |                       |                  |                       | -1.11 (-2.26, 0.05)       |
| 5                                                                                                                                                                                | 1996             | 4.71 (-1.74, 11.58)  | 2001             | -1.81 (-3.25, -0.35)  |                  |                       |                  |                       | -0.04 (-1.91, 1.86)       |
| 6                                                                                                                                                                                | 1996             | -0.7 (-1.97, 0.58)   | 2011             | -10.17 (-23.3, 5.21)  |                  |                       |                  |                       | -2.34 (-4.85, 0.23)       |
| 7                                                                                                                                                                                | 1996             | 3.56 (1.46, 5.69)    | 2002             | -6.67 (-12.16, -0.84) | 2006             | 7.37 (-4.44, 20.64)   | 2009             | -6.41 (-8.94, -3.81)  | -1.02 (-3.16, 1.17)       |
| 8                                                                                                                                                                                | 1996             | 0.11 (-1.62, 1.86)   | 2008             | -5.92 (-10.4, -1.22)  |                  |                       |                  |                       | -1.95 (-3.72, -0.14)      |
| 9                                                                                                                                                                                | 1996             | -2.91 (-3.58, -2.23) |                  |                       |                  |                       |                  |                       | -2.91 (-3.58, -2.23)      |
| 10 Highest decile                                                                                                                                                                | 1996             | -2.75 (-3.98, -1.51) |                  |                       |                  |                       |                  |                       | -2.75 (-3.98, -1.51)      |
| Abbreviations: APC, Annual percentage change; AAPC Average annual percentage change.<br><sup>a</sup> Standardized to the 2013 European Standard Population by 5-year age groups. |                  |                      |                  |                       |                  |                       |                  |                       |                           |

**eTable 5. Joinpoint Analysis of Gender- and Income-specific Age-standardized Incidence Rates of First Psychiatric Hospital Admissions with diagnosis of Mood disorders<sup>a</sup> (continued)**

| ICD-10 Diagnoses<br>F30-F39                                                                                                                                                      | Segment          |                          |                  |                         |                  |                       |                  |                          | Total follow-up<br>period |                     |
|----------------------------------------------------------------------------------------------------------------------------------------------------------------------------------|------------------|--------------------------|------------------|-------------------------|------------------|-----------------------|------------------|--------------------------|---------------------------|---------------------|
|                                                                                                                                                                                  | 1                |                          | 2                |                         | 3                |                       | 4                |                          | 1996-2014                 |                     |
|                                                                                                                                                                                  | Segment<br>Start | APC (95% CI)             | Segment<br>Start | APC (95% CI)            | Segment<br>Start | APC (95% CI)          | Segment<br>Start | APC (95% CI)             | AAPC (95% CI)             |                     |
| <b>Women</b>                                                                                                                                                                     |                  |                          |                  |                         |                  |                       |                  |                          |                           |                     |
| Non-dwelling<br>population                                                                                                                                                       | 1996             | 21.69 (-15.28,<br>74.79) | 1999             | 0.97 (-1.32, 3.32)      |                  |                       |                  |                          |                           | 4.16 (-1.69, 10.37) |
| 1 Lowest decile                                                                                                                                                                  | 1996             | 7.21 (4.62, 9.85)        | 2003             | -0.1 (-1.81, 1.65)      | 2012             | -12.71 (-26.91, 4.23) |                  |                          |                           | 1.15 (-0.95, 3.29)  |
| 2                                                                                                                                                                                | 1996             | -1.08 (-15.39,<br>15.64) | 1998             | 11.05 (-3.75,<br>28.12) | 2001             | 1.5 (-0.74,<br>3.78)  | 2008             | -3.91 (-6.14, -<br>1.61) |                           | 0.88 (-1.8, 3.64)   |
| 3                                                                                                                                                                                | 1996             | 7.92 (4.28, 11.68)       | 2002             | -0.89 (-1.97, 0.19)     |                  |                       |                  |                          |                           | 1.96 (0.71, 3.23)   |
| 4                                                                                                                                                                                | 1996             | 11.72 (-10.2,<br>38.99)  | 1998             | 1.33 (-0.36, 3.04)      | 2008             | -2.96 (-6.06, 0.24)   |                  |                          |                           | 0.97 (-1.53, 3.53)  |
| 5                                                                                                                                                                                | 1996             | 2.32 (0.85, 3.82)        | 2007             | -4.48 (-7.13, -1.76)    |                  |                       |                  |                          |                           | -0.38 (-1.65, 0.91) |
| 6                                                                                                                                                                                | 1996             | 5.51 (0.91, 10.32)       | 2000             | 1.03 (-0.26, 2.33)      | 2009             | -4.3 (-6.83, -1.7)    |                  |                          |                           | 0.48 (-0.76, 1.74)  |
| 7                                                                                                                                                                                | 1996             | 2.77 (0.6, 4.98)         | 2005             | -2.78 (-4.71, -0.81)    |                  |                       |                  |                          |                           | -0.04 (-1.37, 1.3)  |
| 8                                                                                                                                                                                | 1996             | 8.63 (-1.15, 19.39)      | 2000             | -0.71 (-1.92, 0.51)     |                  |                       |                  |                          |                           | 1.29 (-0.82, 3.45)  |
| 9                                                                                                                                                                                | 1996             | 0.73 (-0.75, 2.23)       | 2010             | -7.96 (-16.02, 0.87)    |                  |                       |                  |                          |                           | -1.27 (-3.36, 0.86) |
| 10 Highest decile                                                                                                                                                                | 1996             | 16.12 (-10.61,<br>50.83) | 1998             | -2.27 (-3.19, -1.34)    |                  |                       |                  |                          |                           | -0.38 (-3.1, 2.41)  |
| Abbreviations: APC, Annual percentage change; AAPC Average annual percentage change.<br><sup>a</sup> Standardized to the 2013 European Standard Population by 5-year age groups. |                  |                          |                  |                         |                  |                       |                  |                          |                           |                     |

**eTable 6. Joinpoint Analysis of Sex- and Income-Specific Age-Standardized Incidence Rates of First Psychiatric Hospital Admissions With Diagnosis of Neurotic, Stress-Related and Somatoform Disorders<sup>a</sup>**

| ICD-10 Diagnoses<br>F40-F48                                                                                                                                                      | Segment          |                      |                  |                        |                  |                        |                  |                        | Total follow-up<br>period |
|----------------------------------------------------------------------------------------------------------------------------------------------------------------------------------|------------------|----------------------|------------------|------------------------|------------------|------------------------|------------------|------------------------|---------------------------|
|                                                                                                                                                                                  | 1                |                      | 2                |                        | 3                |                        | 4                |                        | 1996-2014                 |
|                                                                                                                                                                                  | Segment<br>Start | APC (95% CI)         | Segment<br>Start | APC (95% CI)           | Segment<br>Start | APC (95% CI)           | Segment<br>Start | APC (95% CI)           | AAPC (95% CI)             |
| <b>Overall trends</b>                                                                                                                                                            |                  |                      |                  |                        |                  |                        |                  |                        |                           |
| Total                                                                                                                                                                            | 1996             | 0.37 (-1.89, 2.68)   | 2002             | -5.1 (-17.45, 9.09)    | 2005             | 6.77 (-7.34, 23.02)    | 2008             | 0.05 (-2.21, 2.36)     | 0.36 (-2.57, 3.37)        |
| Men                                                                                                                                                                              | 1996             | -1.85 (-5.03, 1.44)  | 2002             | -12.21 (-29.29, 9.01)  | 2005             | 6.87 (-16.19, 36.28)   | 2008             | -2.16 (-5.94, 1.78)    | -2.38 (-6.99, 2.45)       |
| Women                                                                                                                                                                            | 1996             | 3.67 (3.12, 4.21)    | 2012             | -1.91 (-13.0, 10.59)   |                  |                        |                  |                        | 3.03 (1.71, 4.37)         |
| <b>Income-specific trends</b>                                                                                                                                                    |                  |                      |                  |                        |                  |                        |                  |                        |                           |
| <b>Men</b>                                                                                                                                                                       |                  |                      |                  |                        |                  |                        |                  |                        |                           |
| Non-dwelling population                                                                                                                                                          | 1996             | 0.63 (-2.83, 4.22)   | 2006             | 15.83 (-19.47, 66.61)  | 2009             | -8.27 (-16.12, 0.32)   |                  |                        | 0.4 (-5.52, 6.7)          |
| 1 Lowest decile                                                                                                                                                                  | 1996             | -0.41 (-1.42, 0.62)  |                  |                        |                  |                        |                  |                        | -0.41 (-1.42, 0.62)       |
| 2                                                                                                                                                                                | 1996             | 0.33 (-1.22, 1.9)    |                  |                        |                  |                        |                  |                        | 0.33 (-1.22, 1.9)         |
| 3                                                                                                                                                                                | 1996             | 5.12 (-0.03, 10.53)  | 2002             | -12.1 (-34.22, 17.45)  | 2005             | 10.19 (-19.88, 51.55)  | 2008             | -6.39 (-11.47, -1.02)  | -1.06 (-7.26, 5.54)       |
| 4                                                                                                                                                                                | 1996             | 1.84 (-7.96, 12.68)  | 1999             | -10.83 (-27.89, 10.25) | 2002             | 0.07 (-1.4, 1.55)      |                  |                        | -1.55 (-5.03, 2.06)       |
| 5                                                                                                                                                                                | 1996             | -6.01 (-8.81, -3.12) | 2005             | 1.13 (-2.15, 4.51)     |                  |                        |                  |                        | -2.51 (-4.48, -0.49)      |
| 6                                                                                                                                                                                | 1996             | -3.96 (-5.08, -2.84) |                  |                        |                  |                        |                  |                        | -3.96 (-5.08, -2.84)      |
| 7                                                                                                                                                                                | 1996             | -3.66 (-5.24, -2.05) |                  |                        |                  |                        |                  |                        | -3.66 (-5.24, -2.05)      |
| 8                                                                                                                                                                                | 1996             | -21.61 (-43.62, 9.0) | 1998             | 6.76 (-10.86, 27.86)   | 2002             | -24.29 (-48.88, 12.13) | 2005             | 3.38 (-0.91, 7.85)     | -4.14 (-11.02, 3.27)      |
| 9                                                                                                                                                                                | 1996             | -1.32 (-7.08, 4.8)   | 2002             | -22.3 (-36.89, -4.34)  | 2006             | 14.62 (-30.66, 89.47)  | 2009             | -7.39 (-17.27, 3.66)   | -5.74 (-13.61, 2.85)      |
| 10 Highest decile                                                                                                                                                                | 1996             | -0.84 (-6.28, 4.92)  | 2003             | -32.92 (-59.9, 12.21)  | 2006             | 9.04 (-6.74, 27.5)     | 2012             | -22.56 (-63.44, 64.01) | -6.7 (-16.63, 4.4)        |
| Abbreviations: APC, Annual percentage change; AAPC Average annual percentage change.<br><sup>a</sup> Standardized to the 2013 European Standard Population by 5-year age groups. |                  |                      |                  |                        |                  |                        |                  |                        |                           |

**eTable 6. Joinpoint Analysis of Gender- and Income-specific Age-standardized Incidence Rates of First Psychiatric Hospital Admissions with Diagnosis of Neurotic, Stress-related and Somatoform Disorders<sup>a</sup> (continued)**

| ICD-10 Diagnoses<br>F40-F48                                                                                                                                                      | Segment          |                        |                  |                         |                  |                         |                  |                       | Total follow-up<br>period |
|----------------------------------------------------------------------------------------------------------------------------------------------------------------------------------|------------------|------------------------|------------------|-------------------------|------------------|-------------------------|------------------|-----------------------|---------------------------|
|                                                                                                                                                                                  | 1                |                        | 2                |                         | 3                |                         | 4                |                       | 1996-2014                 |
|                                                                                                                                                                                  | Segment<br>Start | APC (95% CI)           | Segment<br>Start | APC (95% CI)            | Segment<br>Start | APC (95% CI)            | Segment<br>Start | APC (95% CI)          | AAPC (95% CI)             |
| <b>Women</b>                                                                                                                                                                     |                  |                        |                  |                         |                  |                         |                  |                       |                           |
| Non-dwelling<br>population                                                                                                                                                       | 1996             | 5.73 (3.39, 8.12)      |                  |                         |                  |                         |                  |                       | 5.73 (3.39, 8.12)         |
| 1 Lowest decile                                                                                                                                                                  | 1996             | 12.51 (6.77,<br>18.55) | 2001             | -2.96 (-13.43,<br>8.77) | 2005             | 13.18 (-7.24,<br>38.09) | 2008             | -0.9 (-4.08,<br>2.39) | 4.46 (0.5, 8.58)          |
| 2                                                                                                                                                                                | 1996             | 3.43 (2.61, 4.25)      |                  |                         |                  |                         |                  |                       | 3.43 (2.61, 4.25)         |
| 3                                                                                                                                                                                | 1996             | 3.87 (3.02, 4.73)      |                  |                         |                  |                         |                  |                       | 3.87 (3.02, 4.73)         |
| 4                                                                                                                                                                                | 1996             | 3.51 (2.51, 4.51)      |                  |                         |                  |                         |                  |                       | 3.51 (2.51, 4.51)         |
| 5                                                                                                                                                                                | 1996             | 2.21 (1.28, 3.14)      |                  |                         |                  |                         |                  |                       | 2.21 (1.28, 3.14)         |
| 6                                                                                                                                                                                | 1996             | 2.94 (1.85, 4.05)      |                  |                         |                  |                         |                  |                       | 2.94 (1.85, 4.05)         |
| 7                                                                                                                                                                                | 1996             | 3.63 (2.34, 4.93)      |                  |                         |                  |                         |                  |                       | 3.63 (2.34, 4.93)         |
| 8                                                                                                                                                                                | 1996             | 2.1 (0.78, 3.43)       |                  |                         |                  |                         |                  |                       | 2.1 (0.78, 3.43)          |
| 9                                                                                                                                                                                | 1996             | 3.17 (1.69, 4.68)      |                  |                         |                  |                         |                  |                       | 3.17 (1.69, 4.68)         |
| 10 Highest decile                                                                                                                                                                | 1996             | 1.24 (-0.37, 2.88)     |                  |                         |                  |                         |                  |                       | 1.24 (-0.37, 2.88)        |
| Abbreviations: APC, Annual percentage change; AAPC Average annual percentage change.<br><sup>a</sup> Standardized to the 2013 European Standard Population by 5-year age groups. |                  |                        |                  |                         |                  |                         |                  |                       |                           |

**eTable 7. Contrasts of the Predicted Incidence Rate Ratios Between ICD-10 Diagnostic Main Groups in Different Income Deciles<sup>a</sup>**

|                                                          | Income <sup>b</sup> | Contrast (95% CI)    | P value |
|----------------------------------------------------------|---------------------|----------------------|---------|
| Schizophrenia <sup>d</sup> vs Substance Use <sup>c</sup> | 1                   | 0.69 (0.51, 0.87)    | <.001   |
| Schizophrenia vs Substance Use                           | 2                   | 1.32 (1.14, 1.5)     | <.001   |
| Schizophrenia vs Substance Use                           | 3                   | 1.17 (0.99, 1.35)    | <.001   |
| Schizophrenia vs Substance Use                           | 4                   | 0.71 (0.53, 0.89)    | <.001   |
| Schizophrenia vs Substance Use                           | 5                   | 0.6 (0.42, 0.78)     | <.001   |
| Schizophrenia vs Substance Use                           | 6                   | 0.51 (0.32, 0.69)    | <.001   |
| Schizophrenia vs Substance Use                           | 7                   | 0.45 (0.27, 0.63)    | <.001   |
| Schizophrenia vs Substance Use                           | 8                   | 0.39 (0.21, 0.58)    | <.001   |
| Schizophrenia vs Substance Use                           | 9                   | 0.2 (0.02, 0.38)     | 0.03    |
| Mood Disorders <sup>e</sup> vs Substance Use             | 1                   | -2.4 (-2.58, -2.22)  | <.001   |
| Mood Disorders vs Substance Use                          | 2                   | -0.92 (-1.1, -0.74)  | <.001   |
| Mood Disorders vs Substance Use                          | 3                   | -0.41 (-0.59, -0.23) | <.001   |
| Mood Disorders vs Substance Use                          | 4                   | -0.24 (-0.42, -0.06) | 0.01    |
| Mood Disorders vs Substance Use                          | 5                   | -0.03 (-0.21, 0.15)  | 0.74    |
| Mood Disorders vs Substance Use                          | 6                   | 0.02 (-0.16, 0.2)    | 0.81    |
| Mood Disorders vs Substance Use                          | 7                   | 0.05 (-0.13, 0.24)   | 0.55    |
| Mood Disorders vs Substance Use                          | 8                   | 0.04 (-0.14, 0.22)   | 0.66    |
| Mood Disorders vs Substance Use                          | 9                   | 0.05 (-0.13, 0.23)   | 0.57    |
| Neurotic Disorders <sup>f</sup> vs Substance Use         | 1                   | -2.31 (-2.49, -2.13) | <.001   |
| Neurotic Disorders vs Substance Use                      | 2                   | -0.88 (-1.06, -0.7)  | <.001   |
| Neurotic Disorders vs Substance Use                      | 3                   | -0.51 (-0.69, -0.33) | <.001   |
| Neurotic Disorders vs Substance Use                      | 4                   | -0.29 (-0.48, -0.11) | <.001   |
| Neurotic Disorders vs Substance Use                      | 5                   | -0.16 (-0.34, 0.02)  | 0.08    |
| Neurotic Disorders vs Substance Use                      | 6                   | -0.01 (-0.19, 0.17)  | 0.91    |
| Neurotic Disorders vs Substance Use                      | 7                   | 0.04 (-0.15, 0.22)   | 0.69    |
| Neurotic Disorders vs Substance Use                      | 8                   | 0.08 (-0.1, 0.26)    | 0.37    |
| Neurotic Disorders vs Substance Use                      | 9                   | 0.08 (-0.1, 0.26)    | 0.37    |
| Schizophrenia vs Substance Use                           | 1                   | 0.69 (0.51, 0.87)    | <.001   |
| Schizophrenia vs Substance Use                           | 2                   | 1.32 (1.14, 1.5)     | <.001   |
| Schizophrenia vs Substance Use                           | 3                   | 1.17 (0.99, 1.35)    | <.001   |
| Schizophrenia vs Substance Use                           | 4                   | 0.71 (0.53, 0.89)    | <.001   |
| Schizophrenia vs Substance Use                           | 5                   | 0.6 (0.42, 0.78)     | <.001   |
| Schizophrenia vs Substance Use                           | 6                   | 0.51 (0.32, 0.69)    | <.001   |
| Schizophrenia vs Substance Use                           | 7                   | 0.45 (0.27, 0.63)    | <.001   |
| Schizophrenia vs Substance Use                           | 8                   | 0.39 (0.21, 0.58)    | <.001   |
| Schizophrenia vs Substance Use                           | 9                   | 0.2 (0.02, 0.38)     | 0.03    |
| Mood Disorders vs Schizophrenia                          | 1                   | -3.09 (-3.27, -2.91) | <.001   |

<sup>a</sup>Contrasts of the predicted incidence rate ratios (IRRs) presented in the eFigure12.  
<sup>b</sup>Income is equalised disposable income deciles: 1 the lowest income decile, 10 the highest decile (reference group).  
<sup>c</sup>Substance use: Mental and behavioural disorders due to psychoactive substance use (F10-F19)  
<sup>d</sup>Schizophrenia: Schizophrenia, schizotypal and delusional disorders (F20-F29)  
<sup>e</sup>Mood disorders: Mood disorders (F30-F39)  
<sup>f</sup>Neurotic disorders: Neurotic, stress-related and somatoform disorders (F40-F48)



**eTable 7. Contrasts of the Predicted Incidence Rate Ratios Between ICD-10 Diagnostic Main Groups in Different Income Deciles<sup>a</sup> (continued)**

|                                                                                                                                                                                                                                                                                                                                                                                                                                                                                                                                                                                                        | Income <sup>b</sup> | Contrast (95% CI)    | P value |
|--------------------------------------------------------------------------------------------------------------------------------------------------------------------------------------------------------------------------------------------------------------------------------------------------------------------------------------------------------------------------------------------------------------------------------------------------------------------------------------------------------------------------------------------------------------------------------------------------------|---------------------|----------------------|---------|
| Mood Disorders vs Schizophrenia                                                                                                                                                                                                                                                                                                                                                                                                                                                                                                                                                                        | 1                   | -3.09 (-3.27, -2.91) | <.001   |
| Mood Disorders vs Schizophrenia                                                                                                                                                                                                                                                                                                                                                                                                                                                                                                                                                                        | 2                   | -2.24 (-2.42, -2.05) | <.001   |
| Mood Disorders vs Schizophrenia                                                                                                                                                                                                                                                                                                                                                                                                                                                                                                                                                                        | 3                   | -1.58 (-1.76, -1.4)  | <.001   |
| Mood Disorders vs Schizophrenia                                                                                                                                                                                                                                                                                                                                                                                                                                                                                                                                                                        | 4                   | -0.94 (-1.13, -0.76) | <.001   |
| Mood Disorders vs Schizophrenia                                                                                                                                                                                                                                                                                                                                                                                                                                                                                                                                                                        | 5                   | -0.63 (-0.81, -0.45) | <.001   |
| Mood Disorders vs Schizophrenia                                                                                                                                                                                                                                                                                                                                                                                                                                                                                                                                                                        | 6                   | -0.48 (-0.66, -0.3)  | <.001   |
| Mood Disorders vs Schizophrenia                                                                                                                                                                                                                                                                                                                                                                                                                                                                                                                                                                        | 7                   | -0.4 (-0.58, -0.21)  | <.001   |
| Mood Disorders vs Schizophrenia                                                                                                                                                                                                                                                                                                                                                                                                                                                                                                                                                                        | 8                   | -0.35 (-0.54, -0.17) | <.001   |
| Mood Disorders vs Schizophrenia                                                                                                                                                                                                                                                                                                                                                                                                                                                                                                                                                                        | 9                   | -0.15 (-0.33, 0.04)  | 0.11    |
| Neurotic Disorders vs Mood Disorders                                                                                                                                                                                                                                                                                                                                                                                                                                                                                                                                                                   | 1                   | 0.09 (-0.1, 0.27)    | 0.35    |
| Neurotic Disorders vs Mood Disorders                                                                                                                                                                                                                                                                                                                                                                                                                                                                                                                                                                   | 2                   | 0.04 (-0.14, 0.22)   | 0.67    |
| Neurotic Disorders vs Mood Disorders                                                                                                                                                                                                                                                                                                                                                                                                                                                                                                                                                                   | 3                   | -0.1 (-0.28, 0.08)   | 0.29    |
| Neurotic Disorders vs Mood Disorders                                                                                                                                                                                                                                                                                                                                                                                                                                                                                                                                                                   | 4                   | -0.06 (-0.24, 0.12)  | 0.53    |
| Neurotic Disorders vs Mood Disorders                                                                                                                                                                                                                                                                                                                                                                                                                                                                                                                                                                   | 5                   | -0.13 (-0.31, 0.05)  | 0.15    |
| Neurotic Disorders vs Mood Disorders                                                                                                                                                                                                                                                                                                                                                                                                                                                                                                                                                                   | 6                   | -0.03 (-0.21, 0.15)  | 0.72    |
| Neurotic Disorders vs Mood Disorders                                                                                                                                                                                                                                                                                                                                                                                                                                                                                                                                                                   | 7                   | -0.02 (-0.2, 0.16)   | 0.84    |
| Neurotic Disorders vs Mood Disorders                                                                                                                                                                                                                                                                                                                                                                                                                                                                                                                                                                   | 8                   | 0.04 (-0.14, 0.22)   | 0.65    |
| Neurotic Disorders vs Mood Disorders                                                                                                                                                                                                                                                                                                                                                                                                                                                                                                                                                                   | 9                   | 0.03 (-0.15, 0.21)   | 0.73    |
| <sup>a</sup> Contrasts of the predicted incidence rate ratios (IRRs) presented in the eFigure12.<br><sup>b</sup> Income is equalised disposable income deciles: 1 the lowest income decile, 10 the highest decile (reference group).<br><sup>c</sup> Substance use: Mental and behavioural disorders due to psychoactive substance use (F10-F19)<br><sup>d</sup> Schizophrenia: Schizophrenia, schizotypal and delusional disorders (F20-F29)<br><sup>e</sup> Mood disorders: Mood disorders (F30-F39)<br><sup>f</sup> Neurotic disorders: Neurotic, stress-related and somatoform disorders (F40-F48) |                     |                      |         |



**eFigure 1. Trends in Age-Standardized Incidence Rates of First Psychiatric Hospital Admissions With Organic Mental Disorders, Behavioral Syndromes Associated With Physiological Disturbances, and Personality Disorders**

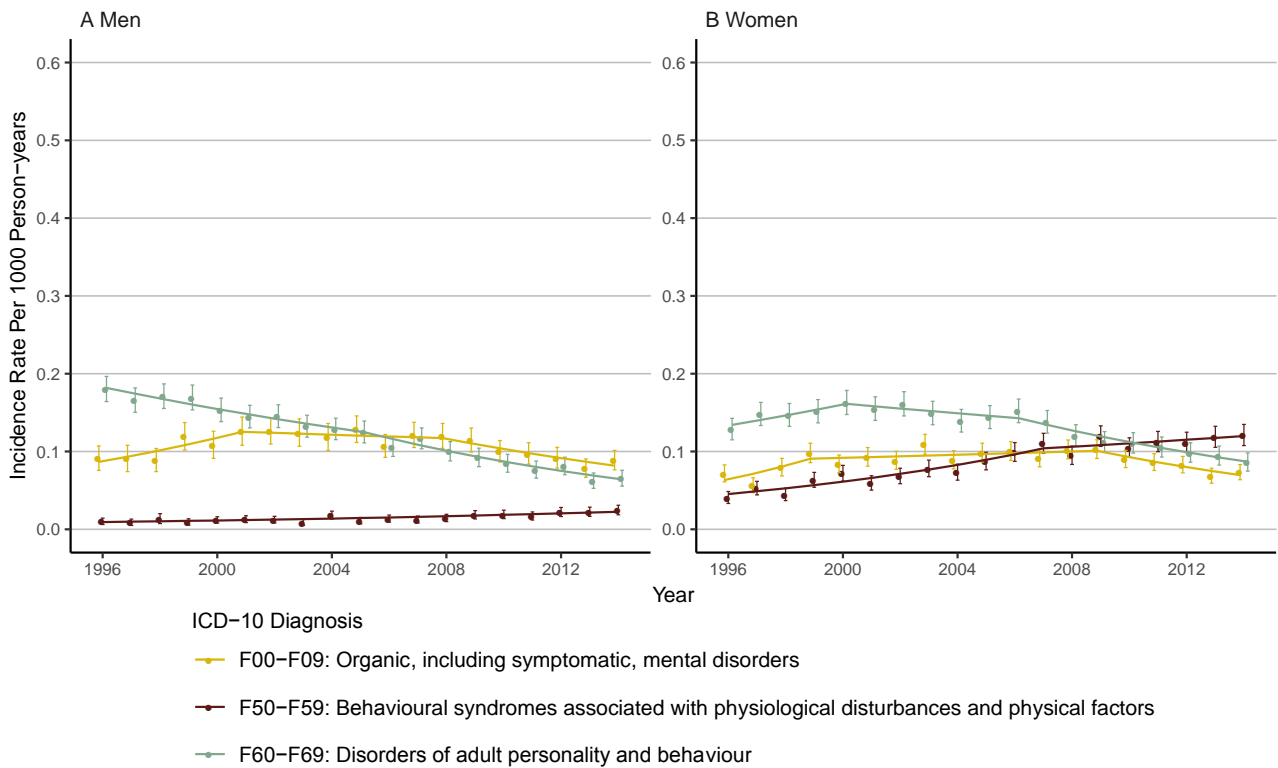

A, Men. B, Women. Data markers denote the annual age-standardized incidence rates per 1000 person-years; bars present 95 % confidence intervals. Lines represent results of the joinpoint regression model. Rates have been age-standardized to the 2013 European Standard Population by 5-year age groups.

**eFigure 2. Trends in Age-Standardized Incidence Rates of First Psychiatric Hospital Admissions With Disorders With Onset Usually Occurring in Childhood and Adolescence**

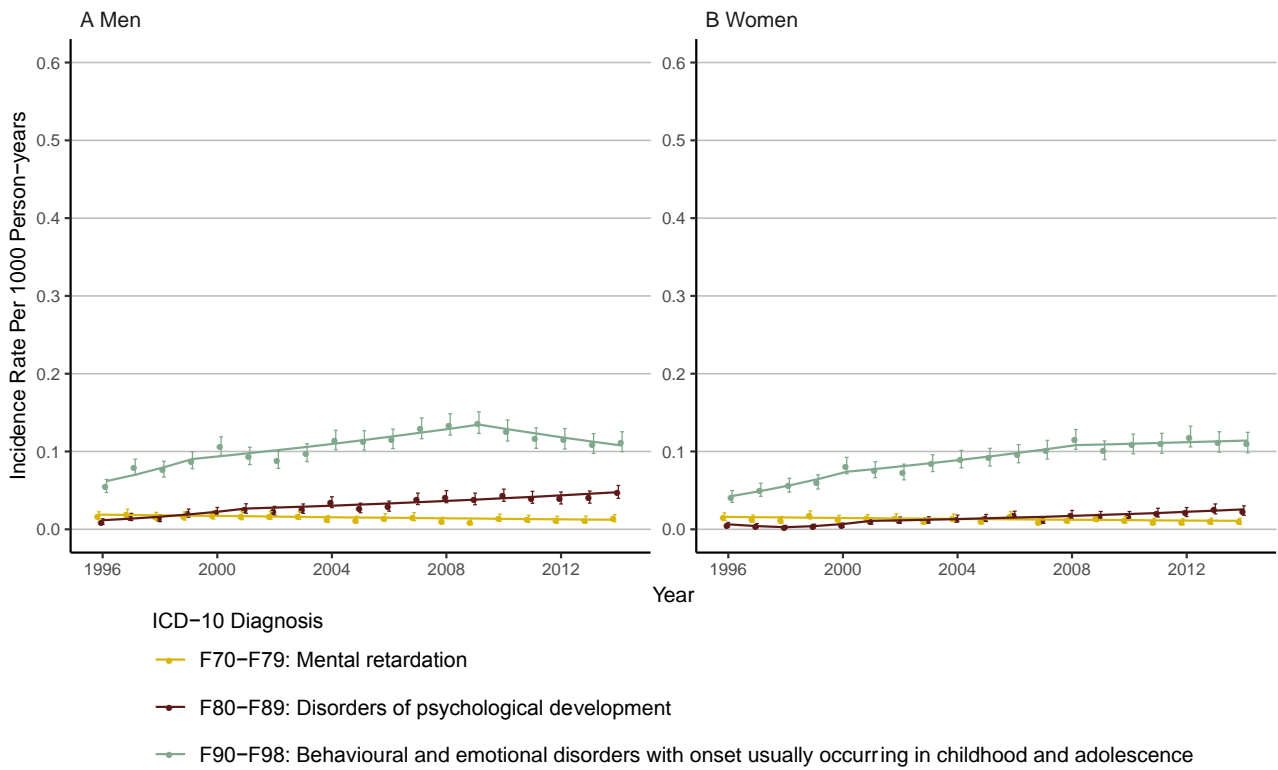

A, Men. B, Women. Data markers denote the annual age-standardized incidence rates per 1000 person-years; bars present 95 % confidence intervals. Lines represent results of the joinpoint regression model. Rates have been age-standardized to the 2013 European Standard Population by 5-year age groups.

**eFigure 3. Trends in Age-Standardized Incidence Rates of First Psychiatric Hospital Admissions With Disorders With Major Psychotic Features**

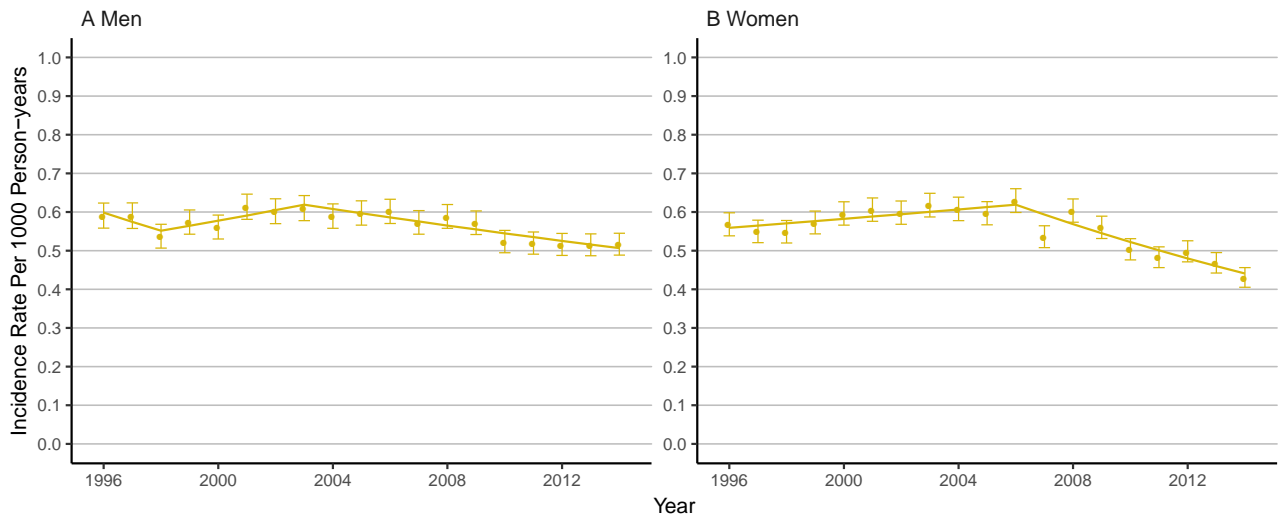

A, Men. B, Women. Data markers denote the annual age-standardized incidence rates per 1000 person-years; bars present 95 % confidence intervals. Lines represent results of the joinpoint regression model. Rates have been age-standardized to the 2013 European Standard Population by 5-year age groups. Major psychotic disorders include the following ICD-10 diagnoses: F20, F22-F29, F30.1, F30.2, F30.8, F30.9, F31.1, F31.2, F31.5, F31.6, F32.3, F33.3, F1x.5 and F1x.7

**eFigure 4. Trends in Age-Standardized Annual Incidence Rates of First Psychiatric Hospital Admissions in the Nondwelling Finnish Population**

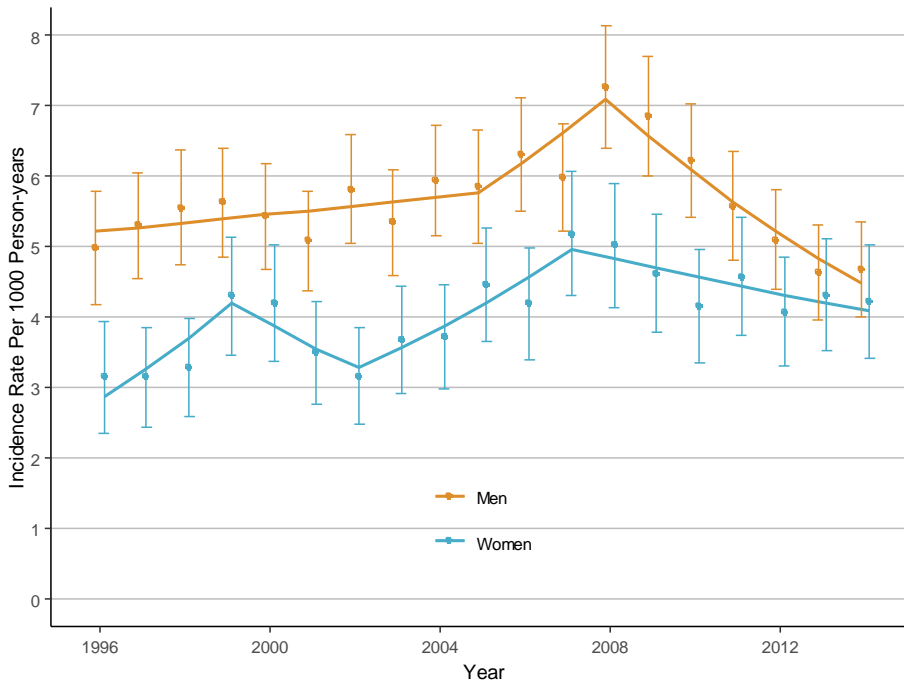

Data markers denote the annual age-standardized incidence rates per 1000 person-years; bars present 95 % confidence intervals. Lines represent results of the joinpoint regression model. Rates have been age-standardized to the 2013 European Standard Population by 5-year age groups.

**eFigure 5. Trends in Income Decile- and Sex-Specific, Age-Standardized Incidence Rates of First Psychiatric Hospital Admissions With Substance Use Disorders (ICD-10 Codes F10-F19)**

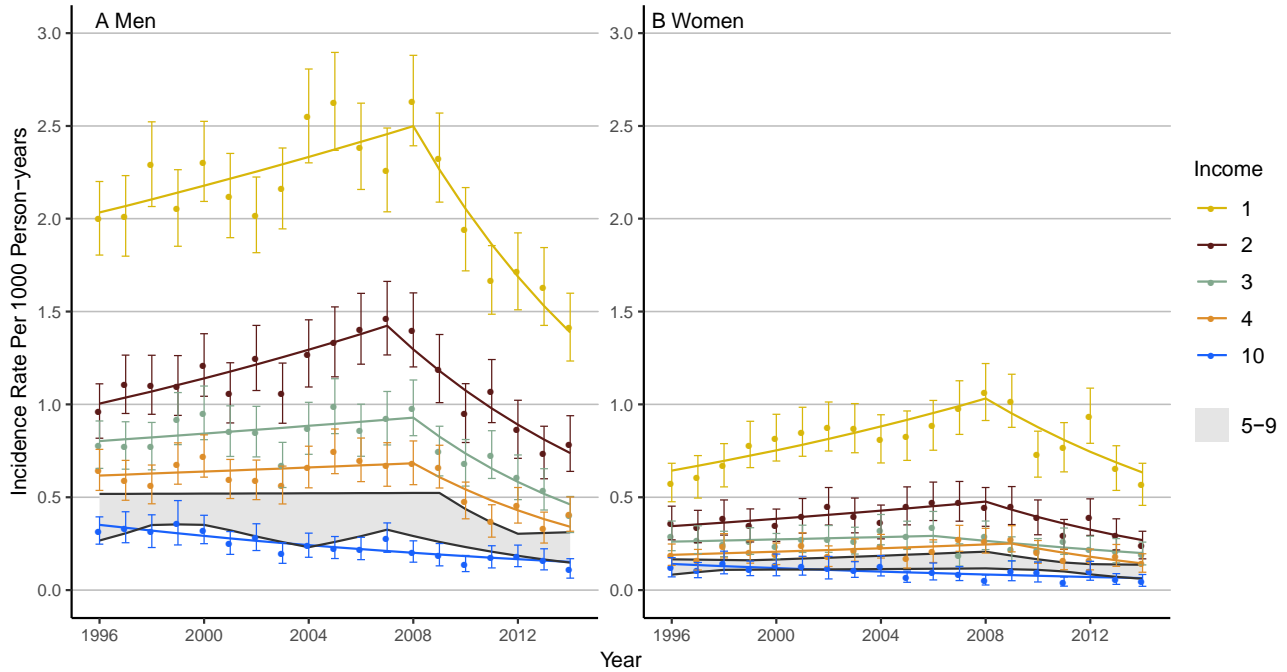

A, In men. B, In women. Data markers denote the annual age-standardized incidence rates per 1000 person-years; bars present 95 % confidence intervals. Lines represent the results of the joinpoint regression model. Rates have been age-standardized to the 2013 European Standard Population by 5-year age groups. Income is equalised disposable income deciles: 1 lowest income decile, 10 highest decile. The grey ribbon contains income deciles 5, 6, 7, 8, and 9.

**eFigure 6. Trends in Income Decile- and Sex-Specific, Age-Standardized Incidence Rates of First Psychiatric Hospital Admissions With Schizophrenia, Schizotypal and Delusional Disorders (ICD-10 Codes F20-F29)**

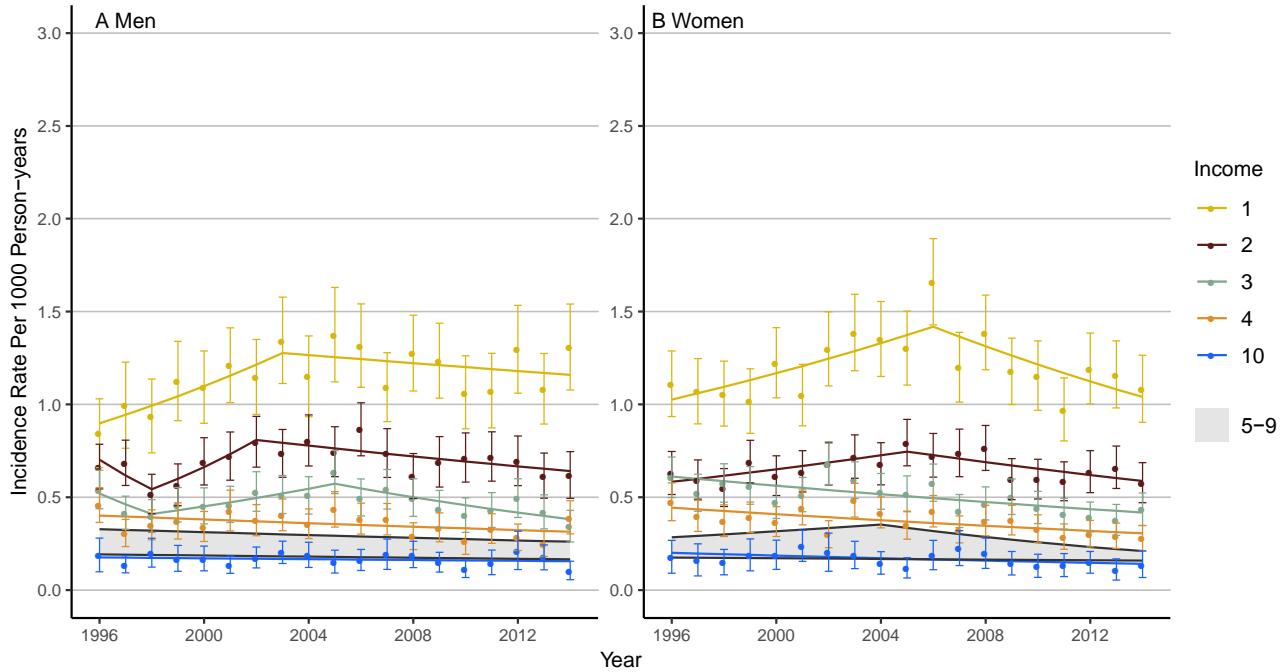

A, In men. B, In women. Data markers denote the annual age-standardized incidence rates per 1000 person-years; bars present 95 % confidence intervals. Lines represent the results of the joinpoint regression model. Rates have been age-standardized to the 2013 European Standard Population by 5-year age groups. Income is equivalised disposable income deciles: 1 lowest income decile, 10 highest decile. The grey ribbon contains income deciles 5, 6, 7, 8, and 9.

**eFigure 7. Trends in Income Decile- and Sex-Specific, Age-Standardized Incidence Rates of First Psychiatric Hospital Admissions With Mood Disorders (ICD-10 Codes F30-F39)**

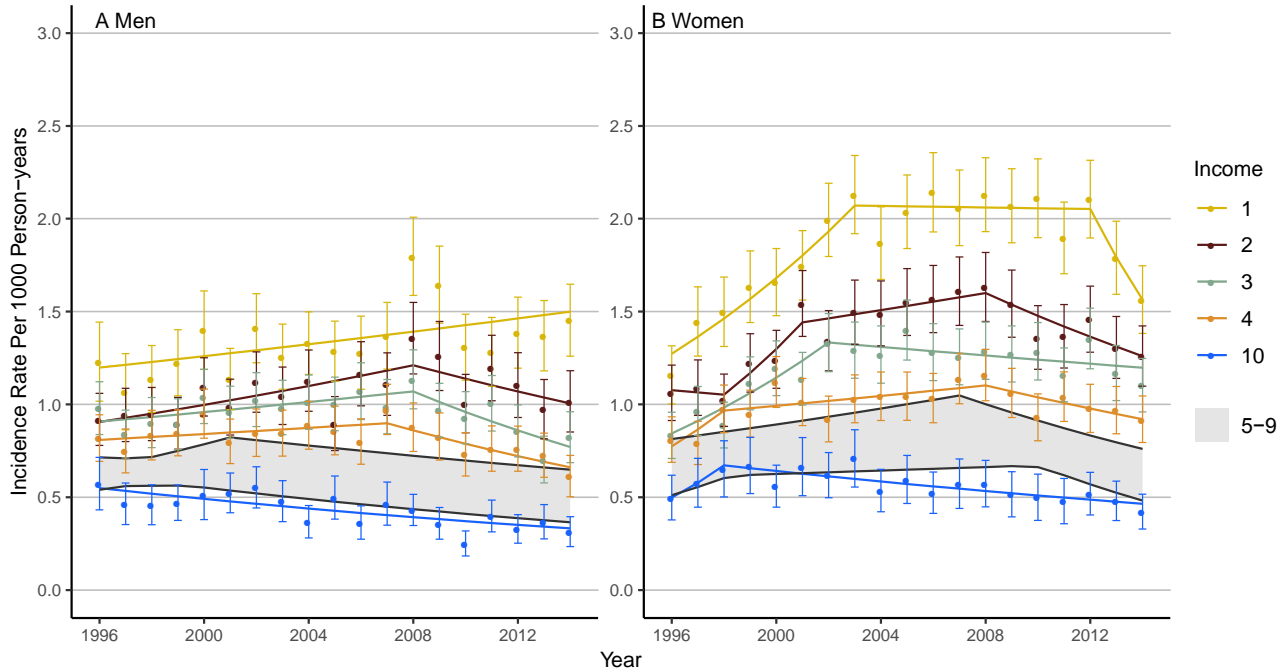

A, In men. B, In women. Data markers denote the annual age-standardized incidence rates per 1000 person-years; bars present 95 % confidence intervals. Lines represent the results of the joinpoint regression model. Rates have been age-standardized to the 2013 European Standard Population by 5-year age groups. Income is equivalised disposable income deciles: 1 lowest income decile, 10 highest decile. The grey ribbon contains income deciles 5, 6, 7, 8, and 9.

**eFigure 8. Trends in Income Decile- And Sex-Specific, Age-Standardized Incidence Rates of First Psychiatric Hospital Admissions With Neurotic, Stress-Related and Somatoform Disorders (ICD-10 Codes F40-F48)**

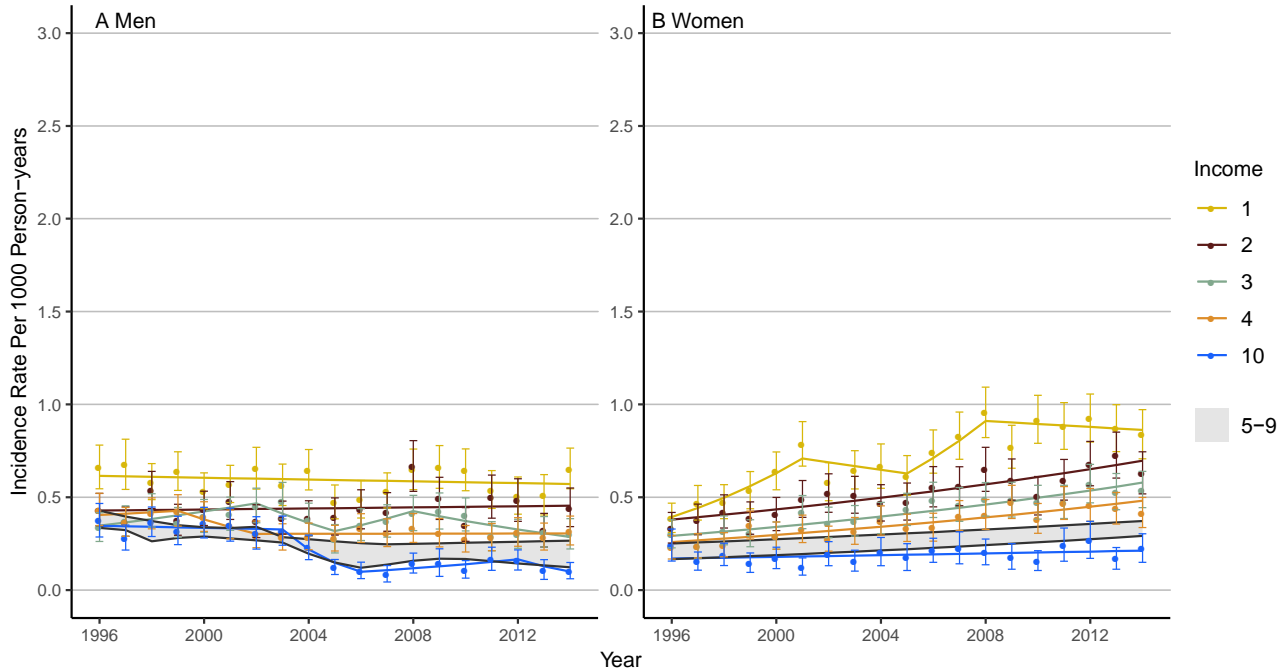

A, In men. B, In women. Data markers denote the annual age-standardized incidence rates per 1000 person-years; bars present 95 % confidence intervals. Lines represent the results of the joinpoint regression model. Rates have been age-standardized to the 2013 European Standard Population by 5-year age groups. Income is equivalised disposable income deciles: 1 lowest income decile, 10 highest decile. The grey ribbon contains income deciles 5, 6, 7, 8, and 9.



**eFigure 9. Annual Sex- and Age Group–Specific Incidence Rates of First Psychiatric Hospital Admissions in the Lowest and Highest Income Deciles**

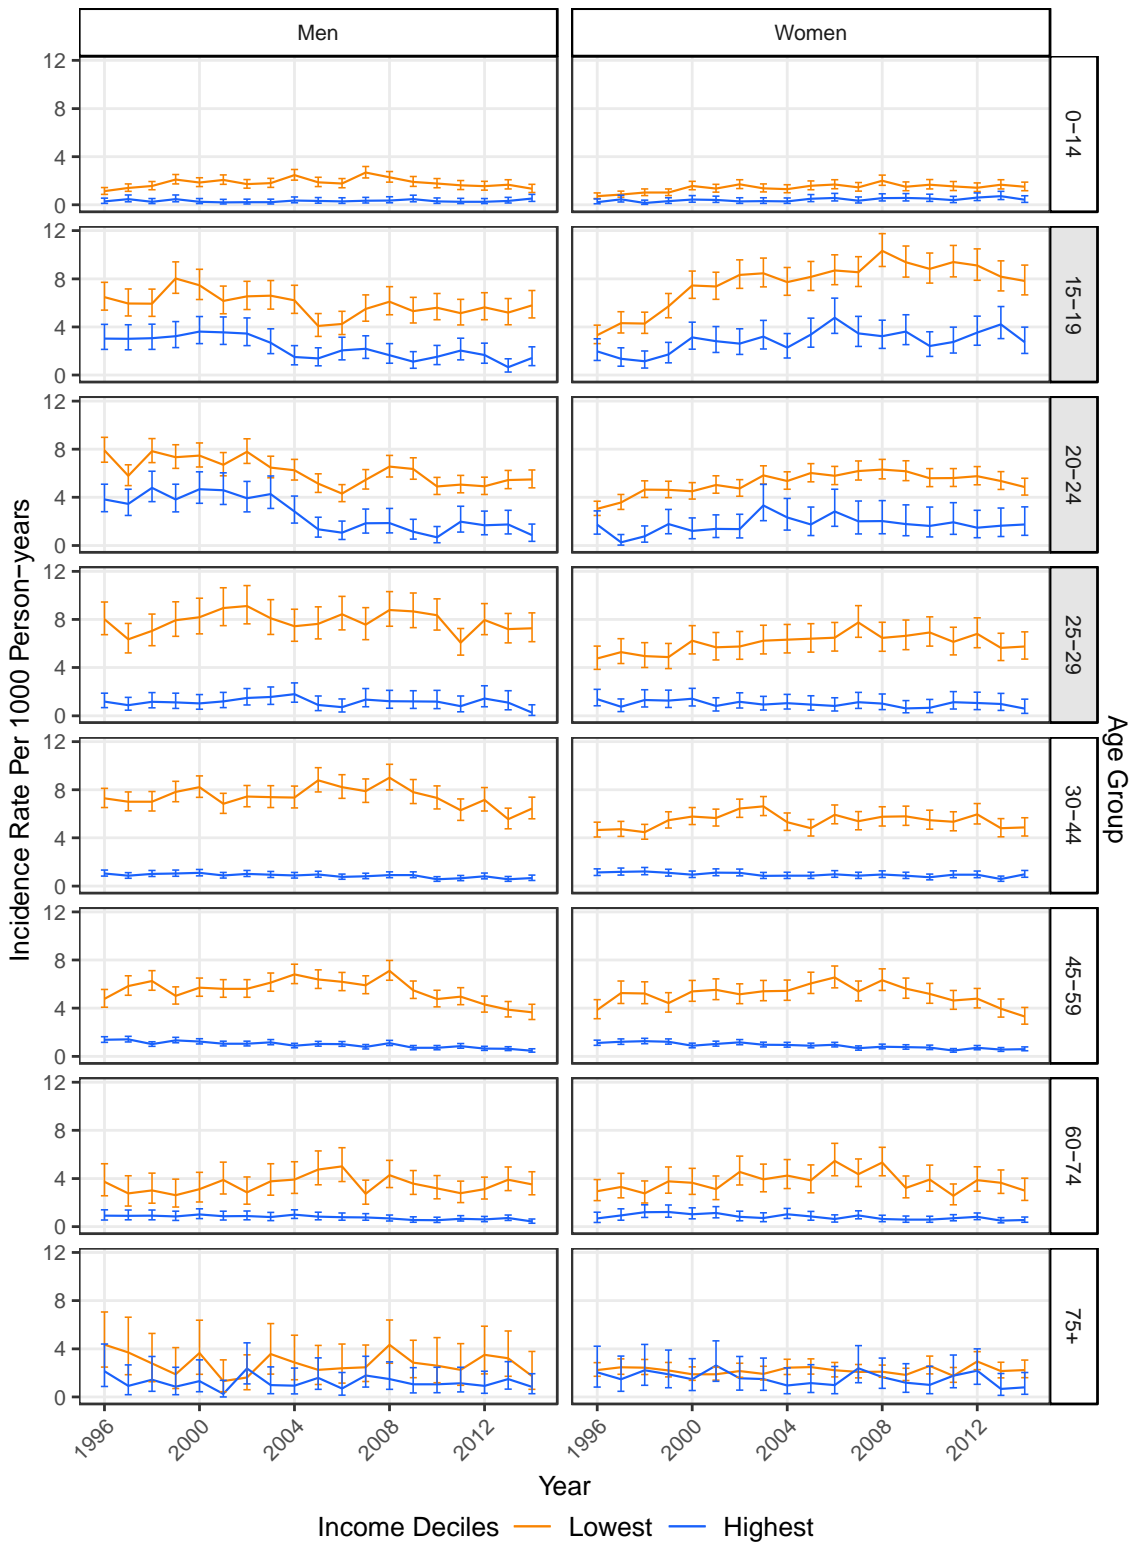

Lines combine annual observed incidence rates; bars present 95 % confidence intervals.

**eFigure 10. Annual Numbers of Person-Years at Risk of First Psychiatric Inpatient Treatments in the Lowest and Highest Income Deciles**

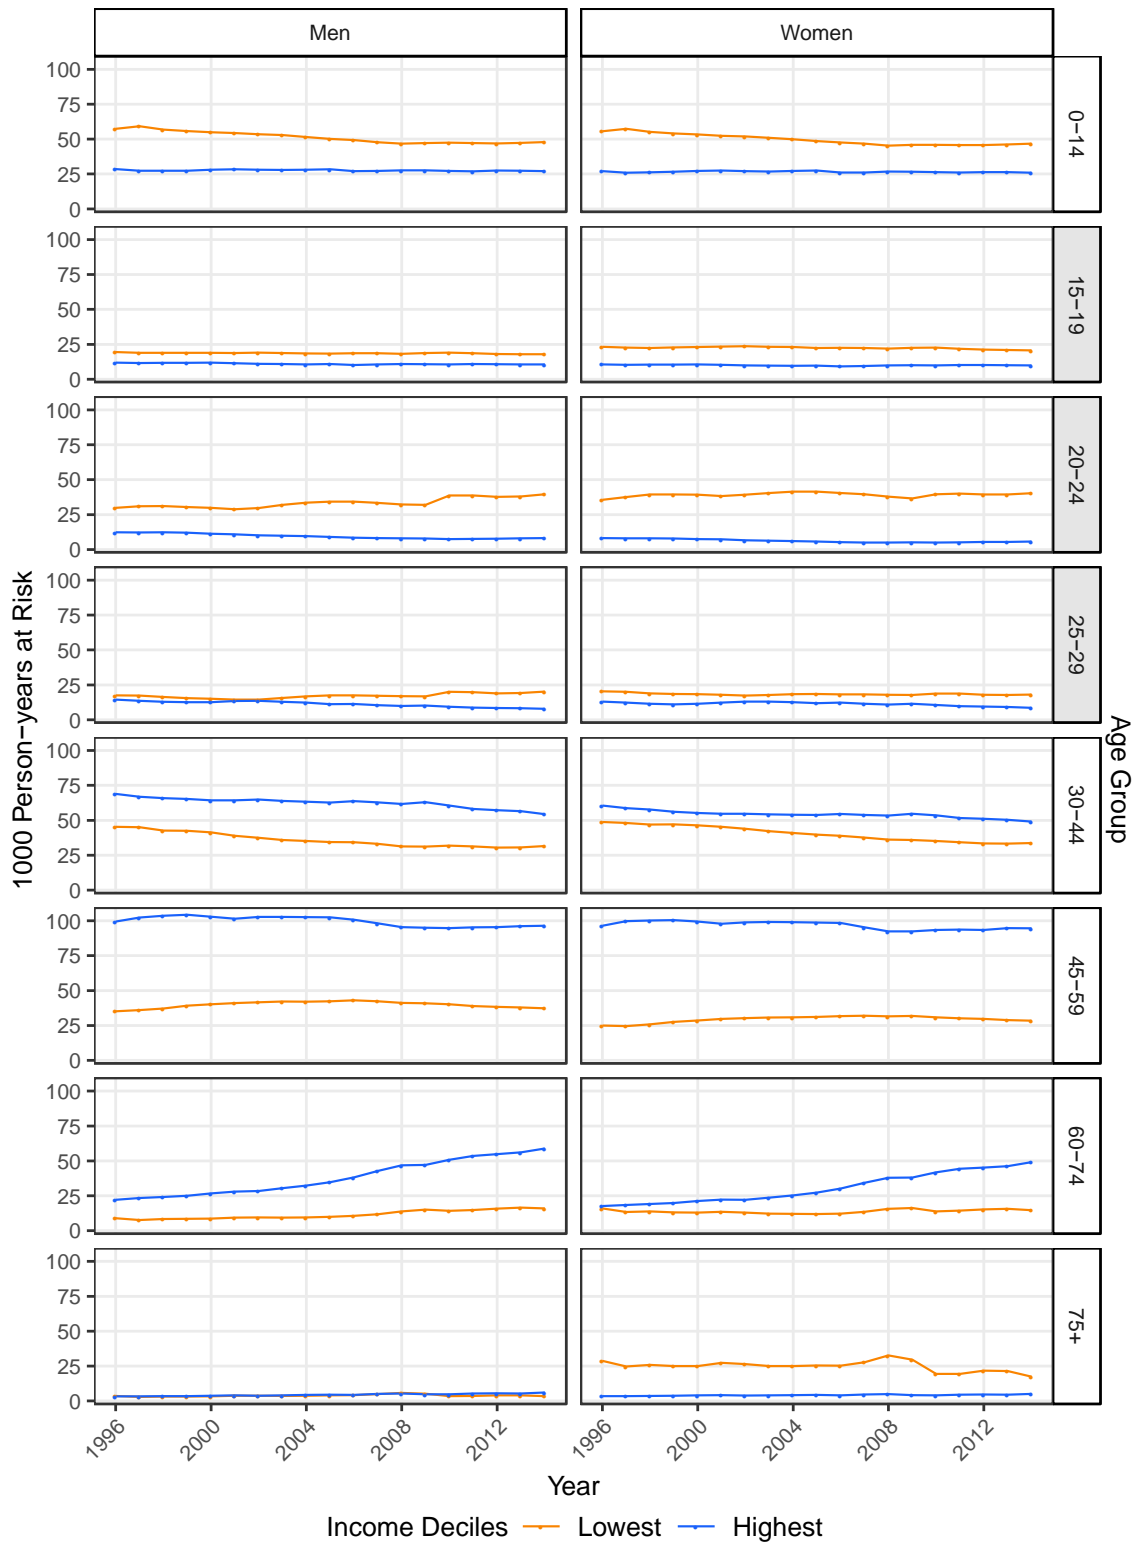

Lines combine annual observed amounts of person-years at risk.

**eFigure 11. Incidence Rate Ratios for the First Psychiatric Hospital Admissions by Income With Different Diagnoses in Persons Aged 20-64 Years**

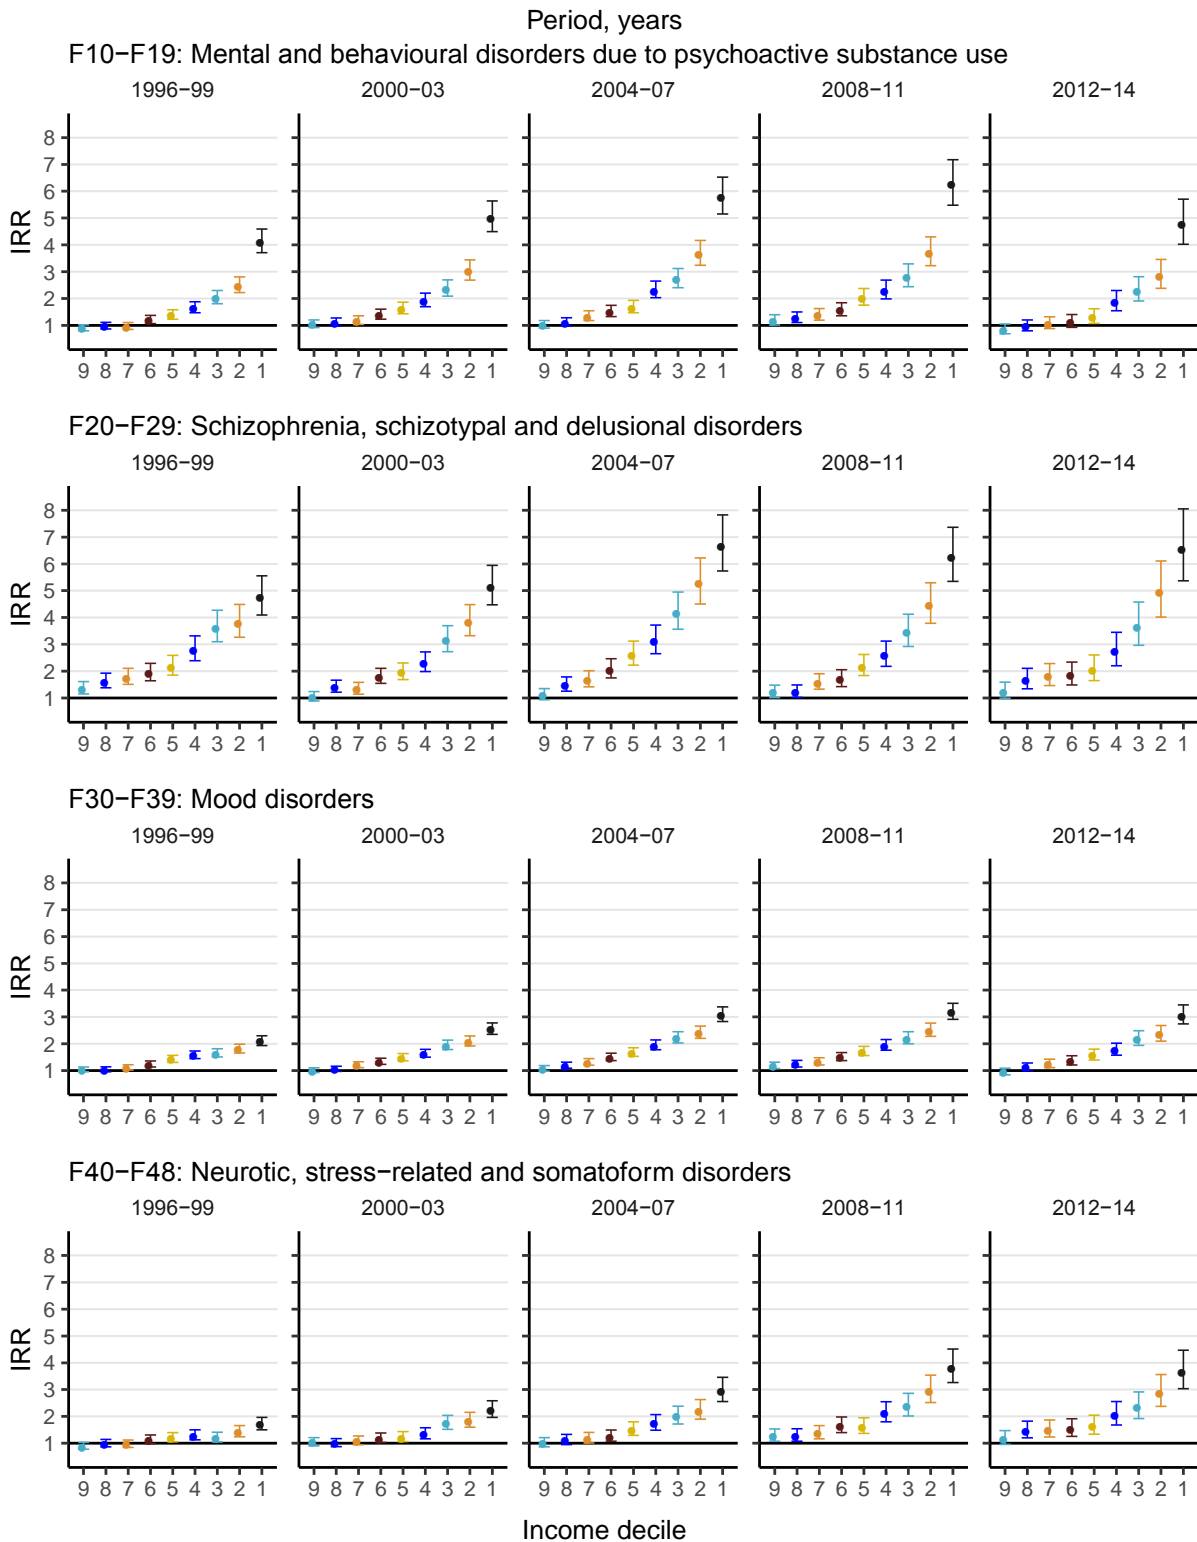

Data markers denote the incidence rate ratio (IRR) estimates compared to the highest income decile; bars present 95 % confidence intervals. The model is adjusted for: Age group, gender, urbanicity, decrease in income decile, education and living alone. Income decile is equalised disposable income deciles: 1 the lowest income decile, 10 the highest decile (reference group).

**eFigure 12. Predicted Incidence Rate Ratios for the First Psychiatric Hospital Admissions in Different ICD-10 Diagnostic Groups in Persons Aged 20-64 Years**

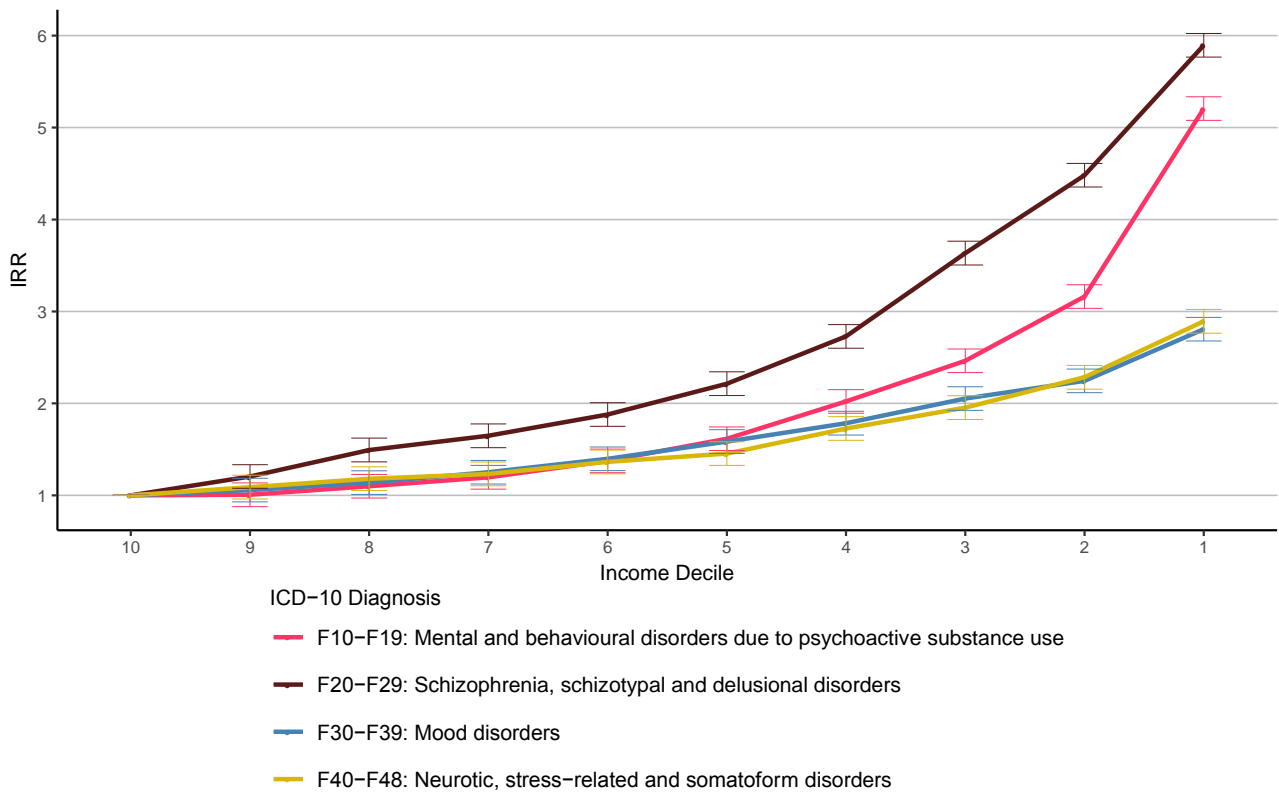

Diagnosis-specific differences in the income gradients, evaluated by a linear regression of the incidence rate ratios (IRRs) on income deciles from the model presented in the eFigure11. Data markers denote the predicted IRRs adjusted for period, calculated using predictive margins; bars present 95 % confidence intervals. Income decile is equalised disposable income deciles: 1 the lowest income decile, 10 the highest decile (reference group).

**eFigure 13. Incidence Rate Ratios for First Psychiatric Hospital Admissions in the Nondwelling Population**

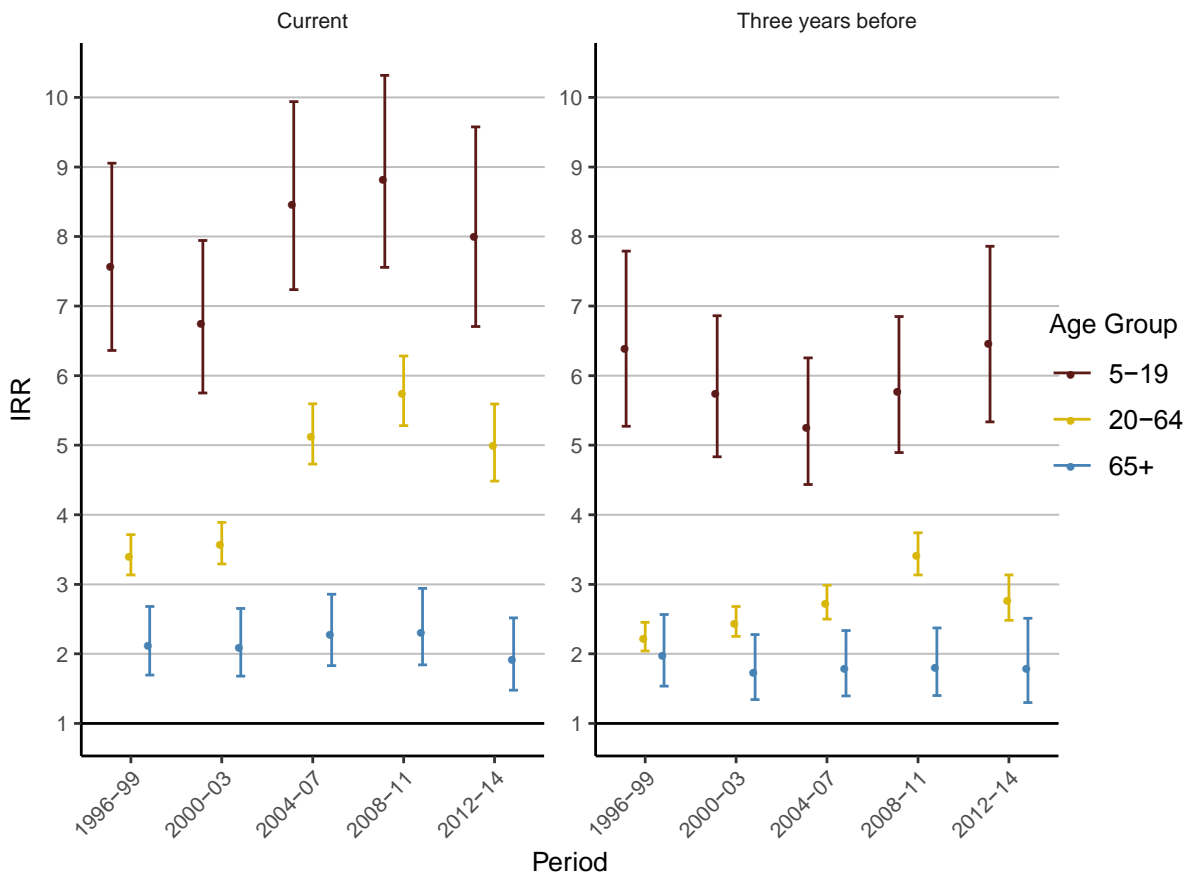

Data markers denote the incidence rate ratio (IRR) estimates compared to the dwelling population with the highest income decile according to the current income status and status three years before the first admissions; bars present 95 % confidence intervals. The model with current income is adjusted for age group, gender, urbanicity and decrease in income decile among those aged 5 to 19 years, and for age group, gender, urbanicity, decrease in income decile, educational level and living alone in those aged 20 to 64 and 65 years or older. The model with income three years previously is adjusted for age group, gender and urbanicity among those aged 5 to 19 years, and for age group, gender, urbanicity, educational level and living alone in those aged 20 to 64 and 65 years or older.

**eFigure 14. Incidence Rate Ratios for the First Psychiatric Hospital Admissions by Income 1 Year Before First Admission**

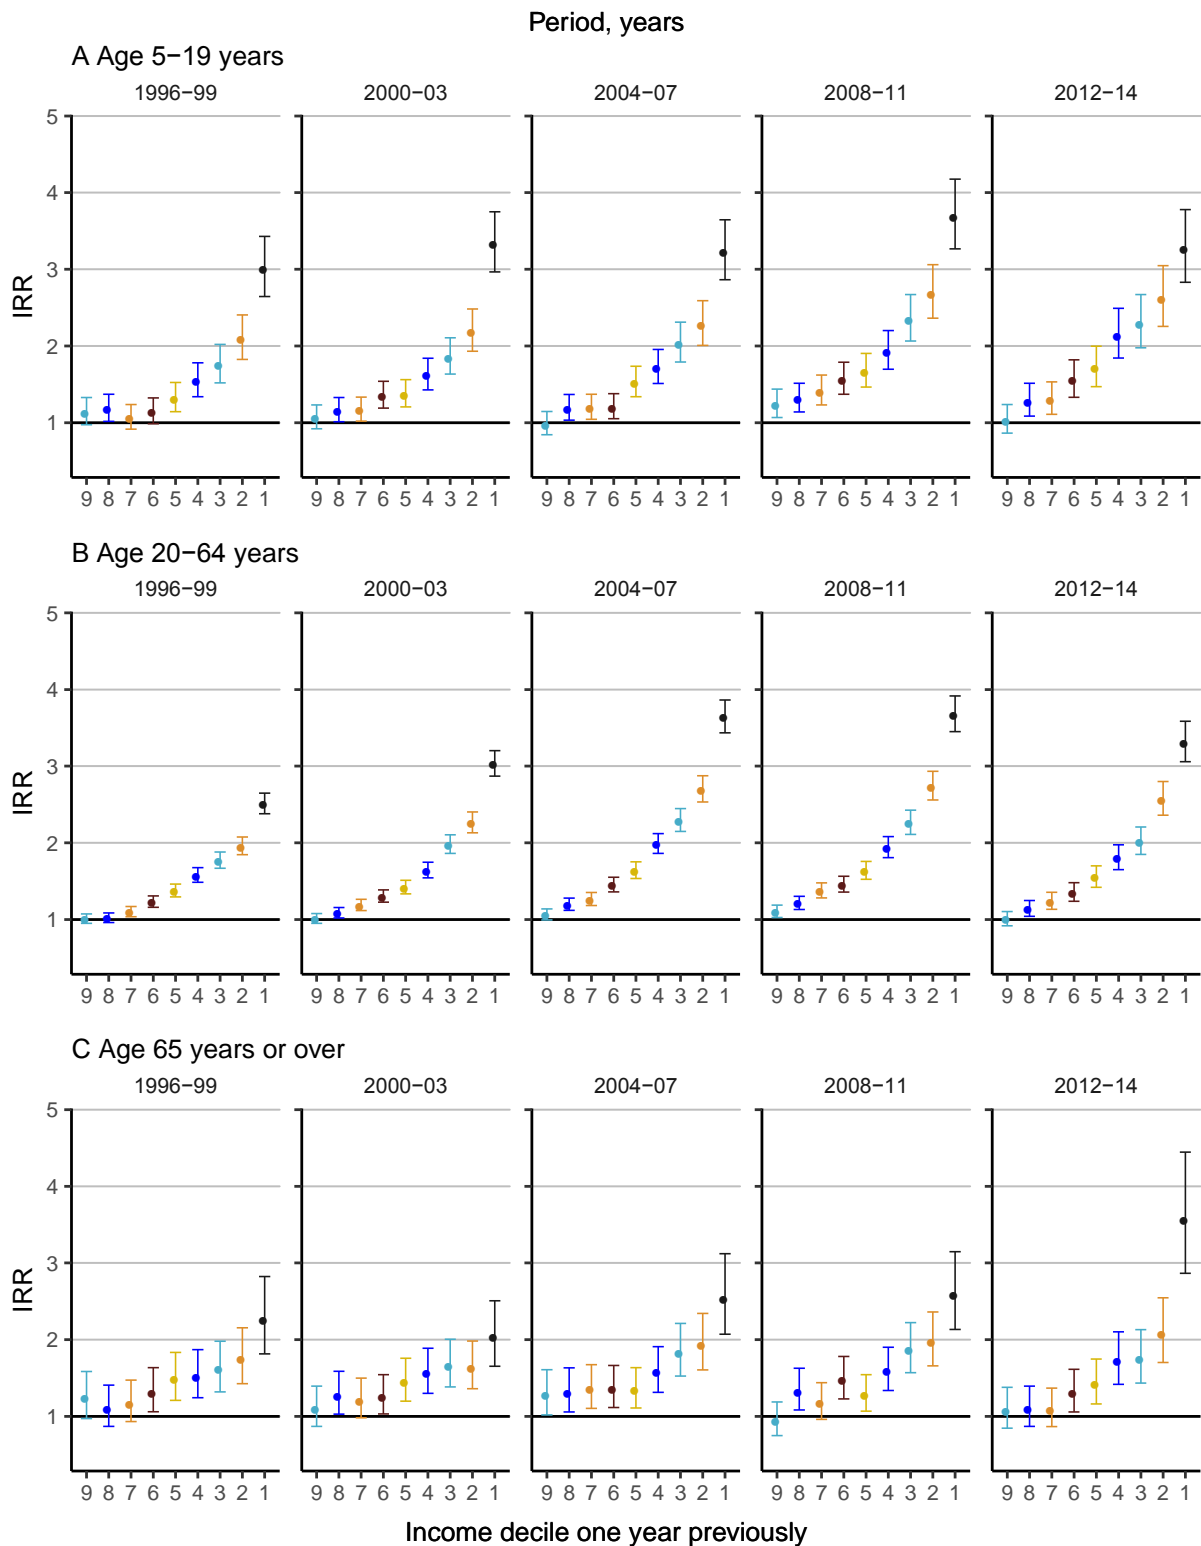

Data markers denote the incidence rate ratio (IRR) estimates compared to the highest income decile; bars present 95 % confidence intervals. The model is adjusted for: A, Age, gender, and urbanicity. B, and C, Age, gender, urbanicity, education, and living alone. Income decile is equalised disposable income deciles: 1 the lowest income decile, 10 the highest decile (reference group).

**eFigure 15. Incidence Rate Ratios for the First Psychiatric Hospital Admissions by Income 3 Years Before First Admission**

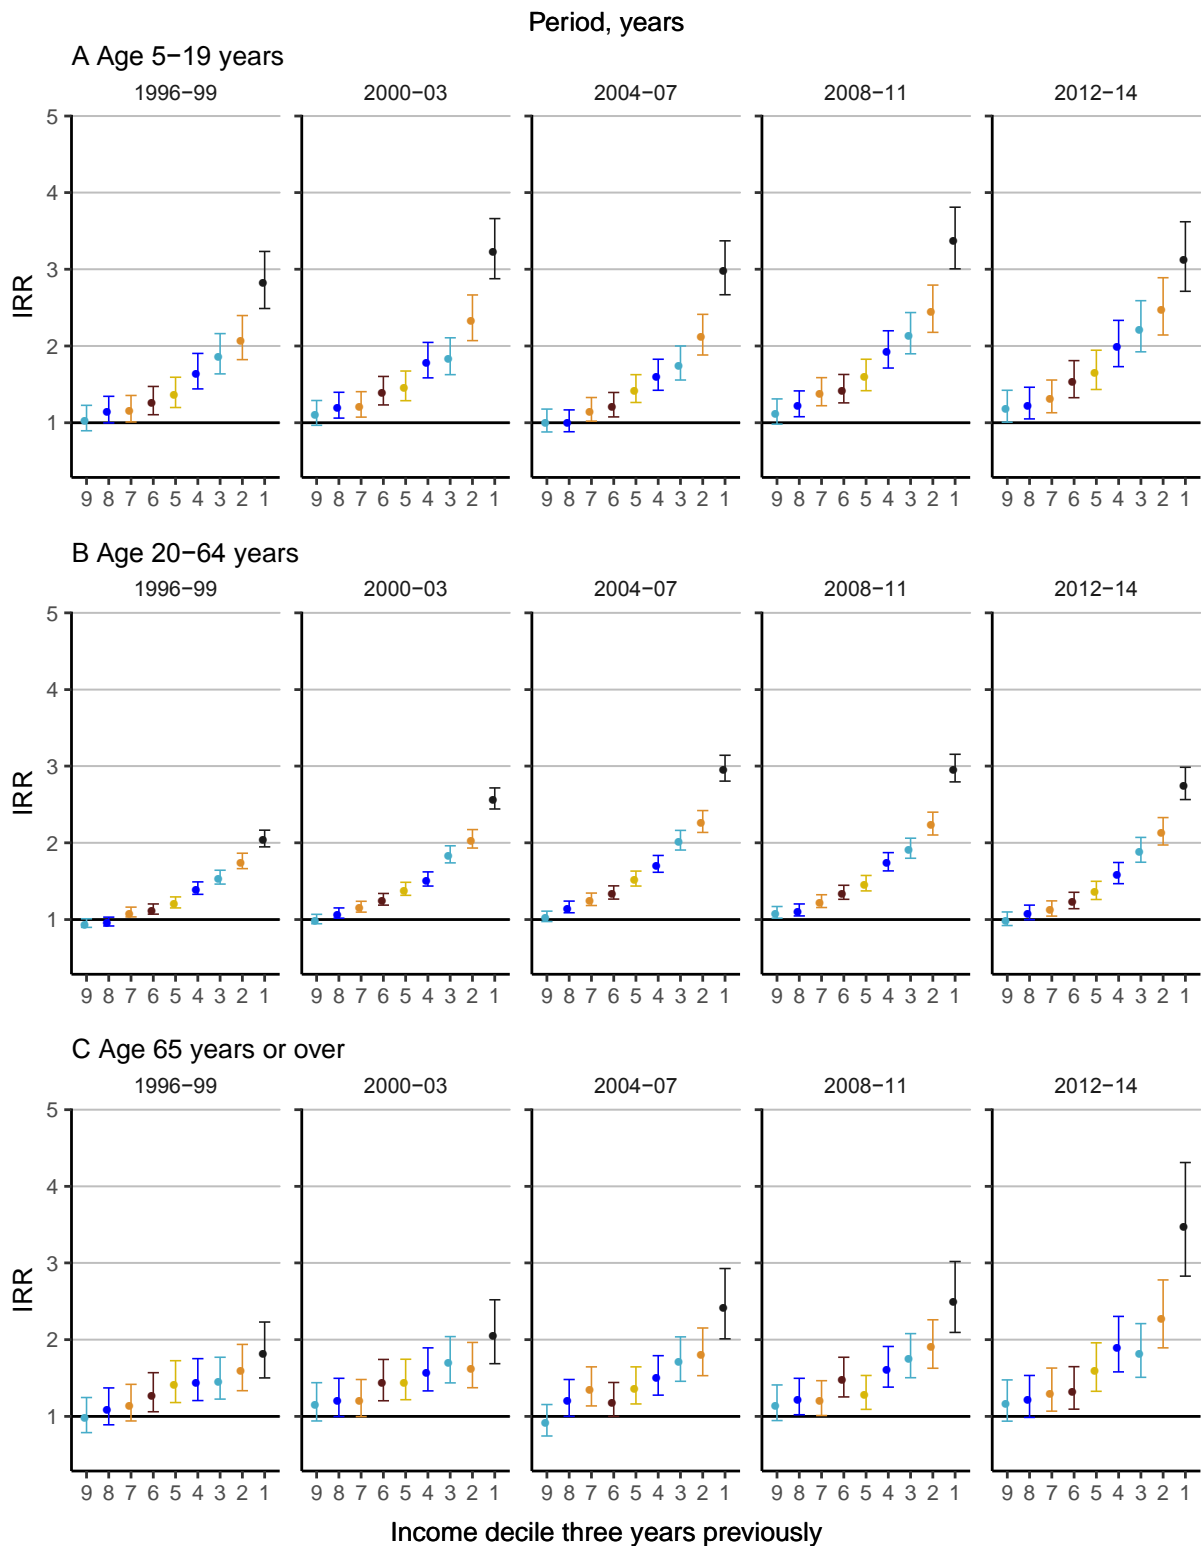

Data markers denote the incidence rate ratio (IRR) estimates compared to the highest income decile; bars present 95 % confidence intervals. The model is adjusted for: A, Age, gender, and urbanicity. B, and C, Age, gender, urbanicity, education, and living alone. Income decile is equalised disposable income deciles: 1 the lowest income decile, 10 the highest decile (reference group).

## eFigure 16. Incidence Rate Ratios for the First Psychiatric Hospital Admissions by Income 5 Years Before First Admission

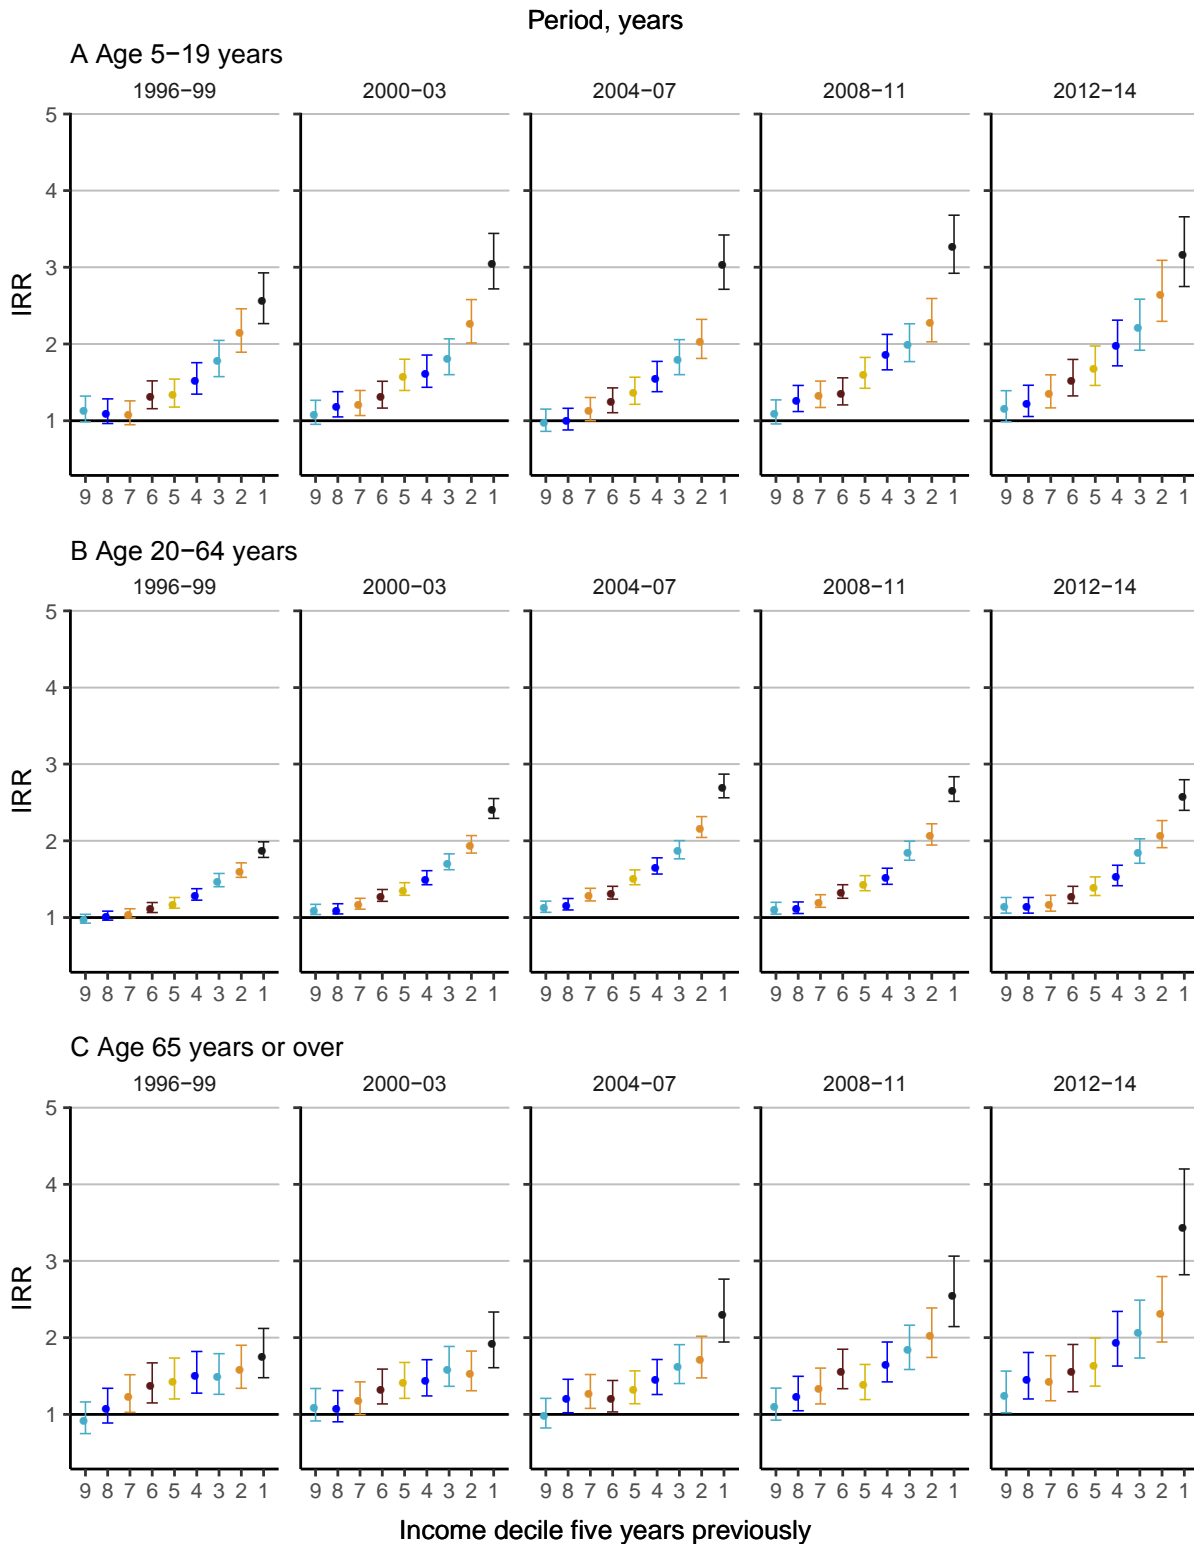

Data markers denote the incidence rate ratio (IRR) estimates compared to the highest income decile; bars present 95 % confidence intervals. The model is adjusted for: A, Age, gender, and urbanicity. B, and C, Age, gender, urbanicity, education, and living alone. Income decile is equalised disposable income deciles: 1 the lowest income decile, 10 the highest decile (reference group).
